# Supplementary material for: Assessment of uteroplacental vascularisation in early first-trimester pregnancy with contrast-enhanced ultrasound and 3D power Doppler angiography: protocol for a prospective, cross-sectional, multicentre and non-randomised open study (“HOPE Study”)
Source: PubMed Central journal article supplement — BMJ Open. 2019 Sep 11;9(9):e030353. doi: 10.1136/bmjopen-2019-030353 (PMC6747665; doi:10.1136/bmjopen-2019-030353), 2019-09-11
Supplement: bmjopen-2019-030353.draft_revisions.pdf [file bmjopen-2019-030353.draft_revisions.pdf]

# BMJ Open

BMJ Open is committed to open peer review. As part of this commitment we make the peer review history of every article we publish publicly available.

When an article is published we post the peer reviewers' comments and the authors' responses online. We also post the versions of the paper that were used during peer review. These are the versions that the peer review comments apply to.

The versions of the paper that follow are the versions that were submitted during the peer review process. They are not the versions of record or the final published versions. They should not be cited or distributed as the published version of this manuscript.

BMJ Open is an open access journal and the full, final, typeset and author-corrected version of record of the manuscript is available on our site with no access controls, subscription charges or pay-per-view fees (<http://bmjopen.bmj.com>).

If you have any questions on BMJ Open's open peer review process please email [info.bmjopen@bmj.com](mailto:info.bmjopen@bmj.com)

# BMJ Open

## Assessment of uteroplacental vascularisation in early first-trimester pregnancy with contrast-enhanced ultrasound and 3D power Doppler angiography: a multicentre prospective study (HOPE).

|                               |                                                                                                                                                                                                                                                                                                                                                                                                                                                                                                                                                                                                  |
|-------------------------------|--------------------------------------------------------------------------------------------------------------------------------------------------------------------------------------------------------------------------------------------------------------------------------------------------------------------------------------------------------------------------------------------------------------------------------------------------------------------------------------------------------------------------------------------------------------------------------------------------|
| Journal:                      | <i>BMJ Open</i>                                                                                                                                                                                                                                                                                                                                                                                                                                                                                                                                                                                  |
| Manuscript ID                 | bmjopen-2019-030353                                                                                                                                                                                                                                                                                                                                                                                                                                                                                                                                                                              |
| Article Type:                 | Protocol                                                                                                                                                                                                                                                                                                                                                                                                                                                                                                                                                                                         |
| Date Submitted by the Author: | 24-Mar-2019                                                                                                                                                                                                                                                                                                                                                                                                                                                                                                                                                                                      |
| Complete List of Authors:     | Bertholdt, Charline; Maternite Regionale Adolphe Pinard de Nancy, Obstetric and Fetal Medicine Unit ; CHU Nancy, INSERM U1254 ESZTO, Marie-Laure; CHR Metz-Thionville, Obstetric Department TOURNIER, Mathilde; Maternite Regionale Adolphe Pinard de Nancy, Obstetric and Fetal Medicine Unit HOSSU, Gabriela; CHU Nancy, INSERM U1254; CHU Nancy, CIC-IT 1433 MELLOUKI, Naoual; CHR Metz-Thionville, PARC - BAL 121 CHERIFI, Aboubaker; CHU Nancy, INSERM CIC-IT 1433 MOREL, Olivier; Maternite Regionale Adolphe Pinard de Nancy, Obstetric and Fetal Medicine Unit ; CHU Nancy, INSERM U1254 |
| Keywords:                     | Ultrasonography < OBSTETRICS, Prenatal diagnosis < OBSTETRICS, Ultrasound < RADIOLOGY & IMAGING, Physiology < BASIC SCIENCES, Pathology < BASIC SCIENCES                                                                                                                                                                                                                                                                                                                                                                                                                                         |
|                               |                                                                                                                                                                                                                                                                                                                                                                                                                                                                                                                                                                                                  |

SCHOLARONE™  
Manuscripts

1  
2  
3 Assessment of uteroplacental vascularisation in early first-trimester  
4 pregnancy with contrast-enhanced ultrasound and 3D power Doppler  
5 angiography: a multicentre prospective study (HOPE).  
6  
7  
8  
9

10  
11 C.Bertholdt<sup>1, 2</sup>, ML. Eszto<sup>4</sup>, M. Tournier<sup>1</sup>, G. Hossu<sup>3</sup>, N. Mellouki<sup>2</sup>, A. Cherifi<sup>3</sup>,  
12 O. Morel<sup>1, 2</sup>  
13  
14

15  
16  
17  
18  
19 <sup>1</sup> Obstetric and fetal medicine Unit, Maternité Régionale Adolphe Pinard, CHRU de Nancy  
20

21 <sup>2</sup> INSERM U1254, IADI, Vandoeuvre-lès-Nancy  
22

23 <sup>3</sup> INSERM CIC-IT 1433 Innovative Technology, University of Lorraine and University Hospital of Nancy, Nancy,  
24 France  
25

26 <sup>4</sup> Obstetric Department, Hôpital Maternité de Metz, CHR de Metz  
27  
28  
29  
30  
31

32 Corresponding author: C.Bertholdt  
33

34 Maternité Régionale Universitaire, CHRU de Nancy  
35

36 10 rue du Docteur Heydenreich  
37

38 54000 NANCY  
39

40 charline.bertholdt@gmail.com  
41  
42  
43  
44  
45  
46  
47  
48  
49  
50  
51  
52  
53  
54  
55  
56  
57  
58  
59  
60

## Abstract

**Introduction:** Knowledge about the mechanisms leading to the establishment of uteroplacental vascularisation is inadequate, and some of what has been thought to be known for decades has recently been challenged by a showing that the intervillous space, the major area of maternal-fetal exchange, appears to be perfused by maternal blood at as early as 6 weeks of gestation. The vascular flow then seems relatively constant until 13 weeks, when it appears to increase suddenly.

**Objectives:** The principal objective is to quantify the perfusion of the intervillous space by contrast-enhanced ultrasonography (CEUS) during the first-trimester at three different gestational ages (8, 11, and 13 weeks). The secondary objectives are to: (i) describe the indicators of vascularisation of the placenta (intervillous space) and the myometrium at the three gestational ages, measured by CEUS and 3D power Doppler (3DPD) angiography; (ii) compare the diagnostic performance of CEUS and 3DPD for the demonstration and quantification of uteroplacental vascularisation; and (iii) establish a biological collection of placentas to increase knowledge about placental development and functions during pregnancy.

**Methods and Analysis:** This is a prospective, cross-sectional, multicentre, non-randomised, open study. We will include 42 women with ongoing pregnancy and divided into three group of gestational ages (that is, 14 women by per group): 8, 11, and 13 weeks of gestation. 3DPD and then CEUS will be performed and the data about the perfusion kinetics and the 3DPD indices will be calculated and then compared with each other and for each gestational age.

**Ethics:** The appropriate French Ethics Committee (CPP, Comité de Protection des Personnes) Est III approved this study and the related consent forms on April 5, 2016, and the competent authority (ANSM, Agence Nationale de Sécurité du Médicament et des Produits de Santé) authorised the study on June 21, 2016.

### Strengths and limitations of this study

- The recent data will be confirmed in our study with a larger number of women.
- To our knowledge, this will be the first study comparing 3DPD with CEUS. Should the results demonstrate the value of 3DPD, studies with a longitudinal follow-up, that is, of ongoing pregnancies, could be conducted and would enable imaging data to be correlated with final pregnancy outcomes.
- The groups are selected by gestational age.
- The pathophysiologic interpretation of the data will be limited by the absence of information about pregnancy outcome.

## INTRODUCTION

Preeclampsia and intrauterine growth restriction (IUGR) are two principal complications of pregnancy that account for more than 30% of maternal and fetal morbidity and mortality. These diseases, which affect from 4 to 7% of pregnancies, are related to chronic uteroplacental hypoperfusion, and knowledge of its pathophysiologic mechanisms remains inadequate. Currently, the major hypothesis is that defective trophoblastic invasion during the first trimester leads to chronic uteroplacental hypoperfusion (1).

The mechanisms that establish uteroplacental vascularisation during the first trimester were described several decades ago, based on pathology studies, in the absence of functional imaging tools applicable *in vivo* in pregnant women(2,3). The presence of trophoblastic (also called endovascular) plugs in the spiral arteries was thought to prevent perfusion of the intervillous space until approximately 10 weeks of gestation, to enable the trophoblast to develop in a favourable hypoxic situation. More recently, ultrasound exploration seemingly confirming the absence of a Doppler signal before 12 weeks strengthened this hypothesis(4,5). Other work, notably histologic exploration of early-pregnancy hysterectomy specimens suggesting the absence of vascular "connection" before 8 weeks of gestation between the maternal network and the intervillous space and physiological explorations showing the maintenance of a hypoxic environment within the placenta up to 10 weeks of gestation also pointed in this direction at the beginning of this century (2,6).

On the other hand, the chronology and conditions leading to the disappearance of these plugs remained unknown. Based on this knowledge, it was suggested the origin of the chronic placental hypoperfusion phenomena observed in preeclampsia and intrauterine growth restriction might be the premature disappearance of these plugs and therefore the loss of the hypoxic environment (7–11).

This entire set of pathophysiologic hypotheses was called into question in 2017. Specifically, Roberts et al. (*Hum Reprod*, 2017) applied a modern technique of functional imaging — contrast-enhanced ultrasonography (CEUS) — to the placenta to show that the intervillous space was perfused by 6 weeks of gestation(12). They suggested in particular that the plugs disappear between 6 and 8 weeks.

This exploratory work thus presents major interest in terms of the physiological understanding of uteroplacental perfusion in the first trimester. Nonetheless, the study design and the number of pregnancies studied did not make it possible to go farther in understanding the quantitative course of this perfusion of the intervillous space. Accordingly, the authors observed quantitative modification of vascular flow within the intervillous space only starting at 13 weeks; they accordingly hypothesised that late remodelling of the radial arteries led to the reduction of vascular resistance. It is nonetheless also possible that the study lacked the power to show quantitative differences in vascular flow between 6 and 13 weeks.

These new data must imperatively be confirmed by other studies with more subjects, designed in principle with the objective of quantifying flow as a function of gestational age. The

demonstration of blood within the intervillous space at 6 weeks of gestation was possible through the use of an ultrasound contrast product, known to be strictly intravascular.

3D power Doppler (3DPD) angiography is another innovative technique for functional placental imaging. First described in 2004, it has the major interest of being usable in pregnant women because it has no teratogenic risk(13). It appears to present a major potential interest for the study of pathophysiologic phenomena associated with uteroplacental vascularisation(14,15). This technique, however, has only been assessed at a gestational age of 11 weeks (16). Its principal limitations are the absence of absolute specificity of the Doppler signal for blood flow and the impossibility of differentiating maternal and fetal flow. Accordingly, it would be interesting to assess whether 3DPD angiography might make it possible to quantify early perfusion of the intervillous space, by comparing it with CEUS, which is specific for maternal blood flow. If this is the case, contrast product would no longer be necessary for exploring uteroplacental vascularisation during pregnancy.

## OBJECTIVE

### *Primary objective*

The principal objective is to quantify the perfusion of the intervillous space by CEUS during the first trimester at three different gestational ages: 8, 11, and 13 weeks.

### *Secondary objectives*

- Describe the indicators of vascularisation of the placenta (intervillous space) and the myometrium at the three gestational ages, measured by CEUS and 3DPD.
- Compare the diagnostic performance of CEUS and 3DPD for the demonstration and quantification of uteroplacental vascularisation.
- Establish a biological collection of placentas to increase knowledge about placental development and functions during pregnancy.

## METHODS

### *Trial design*

Prospective, physiological, cross-sectional, multicentre, and non-randomised open study. This is a multicentre study including a level III university hospital centre (CHRU Nancy) and a level II regional hospital centre (CHR Metz).

### *Study population*

Table 1 presents the inclusion and non inclusion criteria and Figure 1 presents the flow chart of the study.

1  
2  
3 The participants in this study are women with ongoing pregnancy at the first-trimester. The  
4 analysis of uteroplacental vascularisation by CEUS can only be performed in contexts of  
5 elective abortion, as the contrast product is not authorised for use in ongoing pregnancies.  
6  
7

8 Before inclusion, the women will be informed of the aim, the procedures, and the predictable  
9 risks of the study (no identified clinical risk) by the principal investigator.  
10

### 11 *US acquisition*

12  
13 The ultrasound acquisition will begin in 2D mode by measurement of the crown-rump length  
14 to verify gestational age and study group. The position of the placenta will be noted and the  
15 Doppler spectrum of the uterine arteries, spiral arteries, and radial arteries will be recorded,  
16 with measurements of the pulsatility and resistance indices.  
17  
18

19 First, the 3D Doppler acquisitions will be performed at 4 different predetermined settings  
20 (impact of the settings currently underway: NCT03342014). The instrument used will be a  
21 Voluson S8 (General Electric Healthcare) with a volumetric convex abdominal transducer (4–  
22 8 MHz).  
23  
24

25 Next, the CEUS acquisitions will be performed with a Logiq E9 (General Electric Healthcare)  
26 and an abdominal transducer (1-5 MHz). The ultrasound contrast product used will be  
27 Sonovue® (Bracco Imaging, Italy), administered by bolus injection. A volume of 2.4 mL of  
28 contrast product will be injected per patient, and repeated once if necessary.  
29  
30

### 31 *Image analysis*

32  
33 3DPD angiography: The images will be analysed with VOCAL® software, which makes it  
34 possible to define a volume of interest and to quantify the Doppler signals to calculate the  
35 vascularisation indices (VI, FI, and VFI) automatically (Figure 2). Each volume will be  
36 recorded and analysed independently. Two regions of interest will be traced: one focused on  
37 the placenta and the other on the myometrium (placental bed).  
38  
39

40  
41 CEUS: The images will be analysed with specific software that makes it possible to trace the  
42 regions of interest and to view the perfusion curves and to extract semiquantitative perfusion  
43 indicators from them (Figure 3).  
44  
45

### 46 *Placenta collection and analyses*

47  
48 The placentas will be collected and transferred fresh for preparation. The placental villi will be  
49 isolated and rinsed in saline solution. A portion of the villi (approximately 1 to 2 cm<sup>3</sup> of tissue)  
50 will be frozen at -80°C for the subsequent extraction of RNA and specific proteins. For an  
51 immunohistochemical analysis, a second portion will be fixed in buffered formalin for inclusion  
52 in paraffin and serial sections of 5-µm will be made on superfrost slides. The markers of  
53 oxidative stress will be specifically studied.  
54  
55

### 56 *Outcomes*

1  
2  
3 The principal endpoint is the measurement (in arbitrary units) of signal intensity in the  
4 intervillous space during the first trimester (at 8, 11, and 13 weeks), obtained by CEUS.  
5

6  
7 The secondary outcome measures are:

- 8  
9 1. Measurement of indicators of vascularisation in the intervillous space and the myometrium:  
10 signal intensity and perfusion kinetics.  
11 2. Comparison of the quantitative data about uteroplacental vascularisation obtained with each  
12 technique.  
13 3. Procurement of placental villi that can be analysed to study human placental development  
14 and functions.  
15

### 16 17 18 *Participant timeline*

19  
20 The enrolment of women began in February 2019. In view of the recruitment capacity of our  
21 institutions, the recruitment should be completed by November 2019.  
22

### 23 24 *Patient and public involvement*

25  
26 Patients and public were not involved.  
27

### 28 29 *Premature ending of patient participation*

30  
31 Participants will be excluded from the study in the following situations:

- 32  
33 ▶ Lack of CEUS acquisition  
34  
35 ▶ Withdrawal of consent before the end of the study.  
36

37  
38 Patients will be immediately excluded from the study and replaced with other new participants.  
39 Any decision to withdraw consent will not affect the patient's routine medical care. In the case  
40 of an adverse event related to the study, the patient will be informed and excluded. She will  
41 also receive what additional medical care is necessary or appropriate.  
42

### 43 44 *Follow-up*

45  
46 No specific follow-up has been planned for participants except for standard routine healthcare.  
47 Any adverse events will be noted and reported.  
48

### 49 50 *Sample size consideration*

51  
52 In view of recent data from the literature (Roberts, *Hum Reprod.* 2017), to show a difference in  
53 signal intensity between the three groups (8, 11, and 13 weeks) with  $\alpha$  (corrected for the multiple  
54 comparison) and  $\beta$  risks set respectively at 0.017 and 10%, we should have 14 women in each  
55 group at analysis, that is, 42 women in all.  
56

### 57 58 *Data collection and management:*

59  
60 An electronic case report file (e-CRF) will be created for each woman. The women's anonymity  
will be ensured by mentioning to the maximum extent possible their research code number,



1  
2  
3 followed by the first letters of the last name and first name of the participant on all necessary  
4 documents or by deleting their names by appropriate means (white-out) from the copies of  
5 source documents intended to document the study.  
6

7  
8 The ultrasound data will be anonymised and transferred via a secure server for storage and  
9 archiving directly in the ARCHIMED database, reported to the CNIL (CNIL report number:  
10 1410005) because they cannot be transcribed in the e-CRF. The clinical data concerning the  
11 woman collected are in Table 2.  
12

### 13 *Statistical analysis*

14  
15  
16 The quantitative indicators will be described by their means  $\pm$  standard deviations, medians,  
17 and maximum and minimum values, the qualitative indicators by the number of individuals and  
18 percentages. The mean values will be compared between the groups by Student's t test or the  
19 Mann-Whitney test, matched or not, depending on the type of data. The comparison of imaging  
20 techniques will be completed by Bland-Altman plots.  
21  
22

23  
24 The analyses will be performed with R software.

25  
26 No interim analysis is planned.

27  
28 No statistical criterion for stopping the study is planned.  
29

## 30 **QUALITY CONTROL**

### 31 *Right of access to data and source documents*

32  
33  
34 The medical data of each patient will only be transmitted to the sponsor (Metz-Thionville  
35 Regional Hospital Centre, CHR Metz-Thionville) or any person duly authorised by the sponsor  
36 and, where applicable, to the authorised health authorities, under conditions guaranteeing their  
37 confidentiality.  
38  
39

40  
41 The sponsor and the regulatory authorities may request direct access to the medical file for  
42 verification of the procedures and/or data of the clinical trial, without violating confidentiality  
43 and within the limits permitted by laws and regulations.  
44

45  
46 For research purposes, the processing of personal data relating to persons undergoing research  
47 will be carried out.

48  
49 These data are collected and processed solely on the basis of the legal grounds provided for by  
50 statute and regulations in the context of the performance of the public interest missions of the  
51 Metz-Thionville CHR, in particular those relating to ensuring and contributing to research and  
52 innovation (Article 6.1.e of the GDPR, General Data Protection Regulation). The processing of  
53 personal data of persons participating in research is permitted by the exception provided for in  
54 Article 9.2(i) and (j).  
55

56  
57 This data processing is part of the MR001 reference methodology that the Metz-Thionville  
58 CHR has undertaken to respect.  
59  
60

1  
2  
3 In accordance with the GDPR, persons participating in research have a right of access to their  
4 data (Article 15), a right of rectification (Article 16), a right to erase their data (right to forget)  
5 under the conditions provided for in Article 17, a right to limit the processing provided for in  
6 Article 18, and a right to object to the processing of their personal data (Article 21). These rights  
7 are exercised with the Investigators, who will inform the research sponsor as soon as possible.  
8  
9

10 The persons participating in the research also have a right to complain to the supervisory  
11 authority in France, namely, the Commission Nationale de l'Informatique et des Libertés  
12 (CNIL).  
13  
14

### 15 *Study monitoring*

16  
17 The monitoring will be performed by the appropriate department of the Support Platform for  
18 Clinical Research (PARC) of CHR Metz-Thionville, throughout the study.  
19  
20

21 A Clinical Research Associate (CRA) will travel regularly to each centre to perform the quality  
22 control of the e-CRF data.  
23  
24

25 The CRA will verify that the research is conducted according to the protocol provided in  
26 accordance with regulations and will ensure that every e-CRF contains all of the information  
27 requested.  
28  
29

30 Each patient's e-CRF must be consistent with the source documents.  
31  
32

33 The investigators will allocate adequate time for such monitoring activities. The investigators  
34 will also make sure that the monitor or other compliance or quality assurance reviewer is given  
35 access to all of the above noted study-related documents and study-related facilities (e.g.  
36 Ultrasound, diagnostic laboratory, etc.), and has adequate space to conduct the monitoring  
37 visits.  
38  
39

### 40 *Data management and quality control*

41 Data management will be carried out by the clinical research team CIC-IT of Nancy (INSERM  
42 CIC 1433). The data images (ultrasound) will be automatically transferred to Nancy CIC-IT  
43 and stored after verification in the ArchiMed database declared to the French authorities (CNIL  
44 declaration number: 1410005).  
45  
46

### 47 *Patient data protection*

48 Each patient must be identified on the e-CRF, ultrasound data, and placenta collection with her  
49 initials and identification number indicating her order of inclusion into the study. The  
50 investigators must keep the list of all the patients, including identification numbers, full names  
51 and last known addresses.  
52  
53

54 Patients must be informed in writing about the possibility of audits by authorised  
55 representatives of the sponsor and/or regulatory authorities, in which case the relevant parts of  
56 study-related hospital records may be required.  
57  
58  
59  
60

1  
2  
3 Patients must also be informed that the results obtained will be computerised and analysed, that  
4 local laws will be applied, that their confidentiality will be preserved, and that they are entitled  
5 to obtain any information concerning the data stored and analysed by the computerised system.  
6  
7

## 8 **POTENTIAL RISKS TELATED TO THE STUDY**

9

10 This study may expose the women participating in it to rare, transient, mild side effects. It will  
11 comply at all times with the Good Clinical Practices defined by the Ministry of Health.  
12

13 The only constraint associated with the study is the addition of 3D Doppler acquisitions after  
14 the standard 2D ultrasound; these acquisitions will prolong the procedure by 10 minutes. The  
15 medical devices (Voluson® and Logiq E9®, GE Healthcare) are CE-marked and used routinely  
16 in clinical practice.  
17  
18

19 The contrast product (SonoVue®) is authorised for use in exploring lesions of the liver, breasts,  
20 and great vessels. It will be used according to the guidelines described in the summary of  
21 product characteristics in its French marketing authorisation. In the current state of knowledge  
22 about the safety of contrast products (which have not yet been authorised for use during  
23 pregnancy), adequate evidence exists to affirm their absence of permanent or serious adverse  
24 effects among women.  
25  
26  
27

## 28 **ETHICAL PERMISSION**

29

30 The sponsor and all investigators undertake to conduct this study in accordance with the  
31 Declaration of Helsinki (Ethical Principles for Medical Research Involving Human Subjects,  
32 Tokyo 2004) and its updates, the provisions of European Directive 2001/20-CE as transposed  
33 into French law by L. 2004-806 dated August 9, 2004, on public health policy and 2004-800  
34 dated August 6, 2004, on bioethics and their implementation decrees, and to comply with the  
35 guidelines of Good Clinical Practices (I.C.H. version 4 of May 1, 1996 and Decision of  
36 November 24, 2006).  
37  
38  
39

40 They undertake to adhere to all legislative and regulatory provisions that may concern the  
41 research. In accordance with Article L. 1123-6 of the Public Health Code, the sponsor has  
42 submitted the research protocol the sponsor to the appropriate Committee for the Protection of  
43 Persons (CPP, Patient Protection Committee) Est III, which approved this study and the related  
44 consent forms on April 5, 2018 (Number 16.03.02). The competent authority (ANSM, Agence  
45 Nationale de Sécurité du Médicament et des Produits de Santé) authorised the study on June  
46 21, 2018 (Number 160187A 12).  
47  
48  
49

50 The study is registered under the number NCT02884297 on clinicaltrial.gov and under the  
51 number 2015-005655-27 on EudraCT.  
52

53 The research is to be conducted in accordance with the present Protocol. The Investigators  
54 undertake to respect the protocol in all respects especially with regard to obtaining consent and  
55 the notification and follow-up of serious adverse events.  
56  
57

58 *Information letter and informed consent*  
59  
60

1  
2  
3 Research participants will be informed of the objectives and constraints of the study, their rights  
4 to refuse to participate in the study, or to withdraw from the study at any time. When all essential  
5 information has been conveyed to the subject and the investigators have ensured that the patient  
6 has understood the implications of participating in the trial, the patient's written consent shall  
7 be obtained by an investigator in two original copies. A copy of the information forms and  
8 signed consents will be given to the patient.  
9  
10

11 The investigator will retain the second copy for a minimum of 15 years.  
12  
13

## 14 **PROTOCOL AMENDMENT**

15

16 The sponsor must be informed of any proposed amendment to the protocol by the coordinating  
17 investigator. The changes must be described, substantive or not.  
18

19 A substantial change is a change which is susceptible, in one way or another, to modify the  
20 assurances made to participants who consent to biomedical research (modification of an  
21 inclusion criterion, extending the inclusion period, participation of new centre, etc.).  
22  
23

24 Once the research has begun, any substantial modification thereof at the initiative of the sponsor  
25 must obtain, prior to its implementation, a favourable approval of the committee and an  
26 authorisation from the competent authority. In this case, if necessary, the committee ensures  
27 that a new consent from individuals participating in research is obtained.  
28  
29

30 Any substantial change requires that an authorisation request be made by the sponsor to the  
31 ANSM and/or a notification request by the CPP in accordance with legislative regulation n °  
32 2004-806 of August 9, 2004.  
33  
34

## 35 **FINAL RESEARCH REPORT**

36

37 The coordinator and the mandated biostatistician will collaboratively write the final research  
38 report. This report will be submitted to each of the investigators for review. Once consensus  
39 has been reached, the final version must be endorsed with the signature of each of the  
40 investigators and sent to the sponsor as early as possible after the effective end of the research.  
41 A report prepared according to the reference plan of the competent authority must be forwarded  
42 to the competent authority and the CPP within a year after the end of the research.  
43  
44  
45

## 46 **DISCUSSION**

47

48 This study is a follow-up to that recently published by Roberts et al.(12)  
49

50 Our first objective is to confirm their data, that is, the existence of early perfusion of the  
51 intervillous space (from 8 weeks of gestation) and an increase in vascular flow starting at 13  
52 weeks. We also seek to explore the course of vascular flow rates with gestational age to test  
53 both of the hypotheses advanced about the absence of modification of flow before 13 weeks:  
54 lack of power or external regulatory factors (remodelling of the radial arteries)?  
55  
56  
57

58 To test the first hypothesis, we chose to increase the number of individuals in each group and  
59 to select three gestational age targets: 8, 11, and 13 weeks of gestation. A significant result  
60

1  
2  
3 between 8 and 13 weeks and between 11 and 13 weeks is expected and would thus confirm the  
4 data of Roberts et al. The intermediate group at 11 weeks was chosen arbitrarily and its size  
5 was calculated to be able to show a difference between 8 and 11 weeks.  
6  
7

8 To test the second hypothesis, and as Roberts & Frias have suggested, we will examine vascular  
9 resistance of the radial arteries at these different gestational ages and assess the level of  
10 correlation between the changes in resistance and in blood flow within the intervillous space  
11 (5,17,18).  
12  
13

14 The major difference between their study and ours is the choice of contrast product, a choice  
15 linked solely to the product available by geographic zone. They used Definity® while in  
16 Europe, we use Sonovue®. In principle this difference will have no effect on the comparison  
17 of our results, as their properties and performance are similar (19).  
18  
19

20 Moreover, we have chosen to perform 3DPD angiography at the same time to assess the  
21 applicability of this technique for the detection of blood flow before 11 weeks. Should there be  
22 a high correlation between the 3DPD indices and the indicators of perfusion by CEUS, future  
23 studies will be able to choose only the 3DPD, which will make it possible to envision a  
24 longitudinal follow-up.  
25  
26  
27  
28  
29  
30  
31  
32  
33

34 Contributors: C.B. participated in study design and is carrying out or will carry out recruitment,  
35 Ultrasound acquisition, placental analysis, data analysis and manuscript writing. M.T. is  
36 carrying out or will carry out recruitment, ultrasound acquisition and data analysis. M.L.E. and  
37 O.M. are major investigators for clinical assessment, Ultrasound acquisition and study design.  
38 AC and NM are project managers. GH is in charge of statistical analysis. All authors read and  
39 approved the final manuscript.  
40  
41  
42

43 Fundings: This study won the regional award for clinical research (2016).  
44

45 Competing interests: None declared  
46

47 Patient consent: Obtained  
48

49 Ethics approval: ANSM (the French National Agency for Medicines and Health Products  
50 Safety) and the Committee for the Protection of Persons (Comité de Protection des Personnes,  
51 CPP) approved this study.  
52  
53

54 Data sharing statement : All data generated during the project will be made freely available via  
55 CIC-IT, Nancy. Data obtained from this study will be deposited at CIC-IT Nancy where they  
56 will be maintained for a minimum of 15 years. There are no security, licensing or ethical issues  
57 related to the expected data, and all data used in the project will be generated directly as a result  
58 of the project, without any pre-existing data being used.  
59  
60

1  
2  
3 Trial status : This is an ongoing trial. Recruitment began in February 2019. We expect to  
4 complete recruitment by November 2019. We plan to publish final results in 2020.  
5  
6  
7  
8  
9  
10  
11  
12  
13  
14  
15  
16  
17  
18  
19  
20  
21  
22  
23  
24  
25  
26  
27  
28  
29  
30  
31  
32  
33  
34  
35  
36  
37  
38  
39  
40  
41  
42  
43  
44  
45  
46  
47  
48  
49  
50  
51  
52  
53  
54  
55  
56  
57  
58  
59  
60

For peer review only

## REFERENCES

1. Burton GJ, Jauniaux E. Pathophysiology of placental-derived fetal growth restriction. *Am J Obstet Gynecol*. 2018 Feb;218(2S):S745–61.
2. Jauniaux E, Watson A, Burton G. Evaluation of respiratory gases and acid-base gradients in human fetal fluids and uteroplacental tissue between 7 and 16 weeks' gestation. *Am J Obstet Gynecol*. 2001 Apr;184(5):998–1003.
3. Kurjak A, Kupesic S. Doppler assessment of the intervillous blood flow in normal and abnormal early pregnancy. *Obstet Gynecol*. 1997 Feb;89(2):252–6.
4. Carbillon L, Challier JC, Alouini S, Uzan M, Uzan S. Uteroplacental circulation development: Doppler assessment and clinical importance. *Placenta*. 2001 Nov;22(10):795–9.
5. Coppens M, Loquet P, Kollen M, De Neubourg F, Buytaert P. Longitudinal evaluation of uteroplacental and umbilical blood flow changes in normal early pregnancy. *Ultrasound Obstet Gynecol Off J Int Soc Ultrasound Obstet Gynecol*. 1996 Feb;7(2):114–21.
6. Burton GJ, Jauniaux E, Watson AL. Maternal arterial connections to the placental intervillous space during the first trimester of human pregnancy: the Boyd collection revisited. *Am J Obstet Gynecol*. 1999 Sep;181(3):718–24.
7. Greenwold N, Jauniaux E, Gulbis B, Hempstock J, Gervy C, Burton GJ. Relationship among maternal serum endocrinology, placental karyotype, and intervillous circulation in early pregnancy failure. *Fertil Steril*. 2003 Jun;79(6):1373–9.
8. Hempstock J, Jauniaux E, Greenwold N, Burton GJ. The contribution of placental oxidative stress to early pregnancy failure. *Hum Pathol*. 2003 Dec;34(12):1265–75.
9. Jauniaux E, Watson AL, Hempstock J, Bao YP, Skepper JN, Burton GJ. Onset of maternal arterial blood flow and placental oxidative stress. A possible factor in human early pregnancy failure. *Am J Pathol*. 2000 Dec;157(6):2111–22.
10. Jauniaux E, Burton GJ. [The role of oxidative stress in placental-related diseases of pregnancy]. *J Gynecol Obstet Biol Reprod (Paris)*. 2016 Oct;45(8):775–85.
11. Trophoblastic oxidative stress in relation to temporal and regional differences in maternal placental blood flow in normal and abnormal early pregn... - PubMed - NCBI [Internet]. [cited 2019 Mar 10]. Available from: <https://www.ncbi.nlm.nih.gov/pubmed/12507895>
12. Roberts VHJ, Morgan TK, Bednarek P, Morita M, Burton GJ, Lo JO, et al. Early first trimester uteroplacental flow and the progressive disintegration of spiral artery plugs: new insights from contrast-enhanced ultrasound and tissue histopathology. *Hum Reprod Oxf Engl*. 2017 Dec 1;32(12):2382–93.
13. Shih JC, Ko TL, Lin MC, Shyu MK, Lee CN, Hsieh FJ. Quantitative three-dimensional power Doppler ultrasound predicts the outcome of placental chorioangioma. *Ultrasound Obstet Gynecol Off J Int Soc Ultrasound Obstet Gynecol*. 2004 Aug;24(2):202–6.

- 1  
2  
3 14. Duan J, Perdriolle-Galet E, Chabot-Lecoanet A-C, Callec R, Beaumont M, Chavatte-  
4 Palmer P, et al. [Placental 3D Doppler angiography: current and upcoming applications].  
5 J Gynecol Obstet Biol Reprod (Paris). 2015 Feb;44(2):107–18.  
6  
7  
8 15. Duan J, Chabot-Lecoanet A-C, Perdriolle-Galet E, Christov C, Hossu G, Cherifi A, et al.  
9 Utero-placental vascularisation in normal and preeclamptic and intra-uterine growth  
10 restriction pregnancies: third trimester quantification using 3D power Doppler with  
11 comparison to placental vascular morphology (EVUPA): a prospective controlled study.  
12 BMJ Open. 2016 Mar 31;6(3):e009909.  
13  
14 16. Hafner T, Kurjak A, Funduk-Kurjak B, Bekavac I. Assessment of early chorionic  
15 circulation by three-dimensional power Doppler. J Perinat Med. 2002;30(1):33–9.  
16  
17 17. Burton GJ, Woods AW, Jauniaux E, Kingdom JCP. Rheological and physiological  
18 consequences of conversion of the maternal spiral arteries for uteroplacental blood flow  
19 during human pregnancy. Placenta. 2009 Jun;30(6):473–82.  
20  
21 18. Kurjak A, Zudenigo D, Predanic M, Kupesic S, Funduk B. Assessment of the fetomaternal  
22 circulation in threatened abortion by transvaginal color Doppler. Fetal Diagn Ther. 1994  
23 Oct;9(5):341–7.  
24  
25 19. Hyvelin J-M, Gaud E, Costa M, Helbert A, Bussat P, Bettinger T, et al. Characteristics  
26 and Echogenicity of Clinical Ultrasound Contrast Agents: An In Vitro and In Vivo  
27 Comparison Study. J Ultrasound Med Off J Am Inst Ultrasound Med. 2017  
28 May;36(5):941–53.  
29  
30  
31  
32  
33

### **Tables and Figures**

34  
35  
36 Table 1 : Inclusion and non inclusion criteria

37  
38 Table 2 : Data collected

39  
40 Figure 1 : Flow Chart

41  
42 Figure 2 : Three dimensional Power Doppler (3DPD) Analysis

43  
44 Figure 3 : Contrast-enhanced Ultrasound (CEUS) Analysis  
45  
46  
47  
48  
49  
50  
51  
52  
53  
54  
55  
56  
57  
58  
59  
60



Table 1 : Inclusion and non inclusion criteria

| Inclusion criteria                                                                                                                                                                                                                                                                                                                                                                                                                  | Non inclusion criteria                                                                                                                                                                                                                                                                                                                                                                                                                                                              |
|-------------------------------------------------------------------------------------------------------------------------------------------------------------------------------------------------------------------------------------------------------------------------------------------------------------------------------------------------------------------------------------------------------------------------------------|-------------------------------------------------------------------------------------------------------------------------------------------------------------------------------------------------------------------------------------------------------------------------------------------------------------------------------------------------------------------------------------------------------------------------------------------------------------------------------------|
| <ul style="list-style-type: none"> <li>- Woman age <math>\geq</math> 18 years</li> <li>- Gestational age</li> <li><b>8 WG Group</b> : 8 to 8+6</li> <li><b>11 WG Group</b> : 11 to 11+6</li> <li><b>13 WG Group</b> : 13 to 13+6</li> <li>- Body Mass Index <math>\leq</math> 40 kg/m<sup>2</sup></li> <li>- Have given informed and written consent</li> <li>- Have confirmed her request of surgical elective abortion</li> </ul> | <ul style="list-style-type: none"> <li>- Contraindication to contrast injection :<br/>Hypersensitivity to sulfur hexafluoride or any of the other ingredients, history of cardiac disease, respiratory distress syndrome, severe pulmonary hypertension</li> <li>- Woman considered at risk of IUGR/PE :<br/>History of PE or IUGR, Autoimmune disease, Chronic High Blood Pressure, Diabetes</li> <li>- Woman unable to understand or follow the procedure of the study</li> </ul> |

Table 2 : Data collected

|                     |                                                                                                                                     |
|---------------------|-------------------------------------------------------------------------------------------------------------------------------------|
| Family History      | Preeclampsia, intrauterine growth restriction, venous thromboembolic disease, high blood pressure, diabetes                         |
| Obstetrical History | Parity, history of post-partum hemorrhage, history of pregnancy loss or intrauterine fetal death<br>Fibroma or uterine malformation |
| Clinical data       | Body Mass Index<br>Proteinuria<br>Blood pressure (systolic and diastolic)<br>Smoking                                                |
| Current treatments  |                                                                                                                                     |

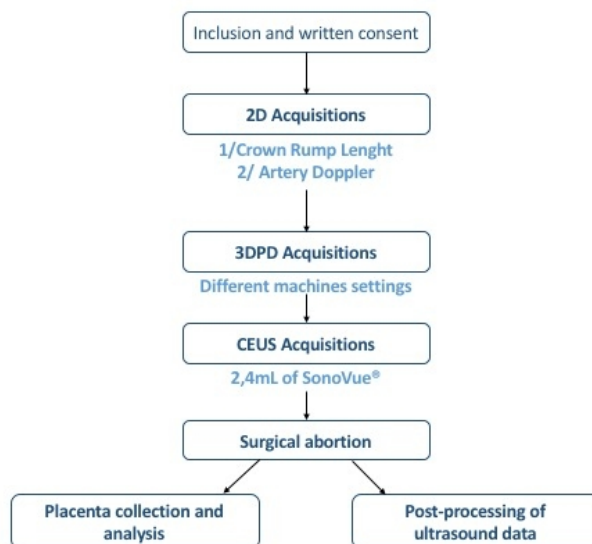

Figure 1: Flow chart

338x190mm (54 x 54 DPI)

1  
2  
3  
4  
5  
6  
7  
8  
9  
10  
11  
12  
13  
14  
15  
16  
17  
18  
19  
20  
21  
22  
23  
24  
25  
26  
27  
28  
29  
30  
31  
32  
33  
34  
35  
36  
37  
38  
39  
40  
41  
42  
43  
44  
45  
46  
47  
48  
49  
50  
51  
52  
53  
54  
55  
56  
57  
58  
59  
60

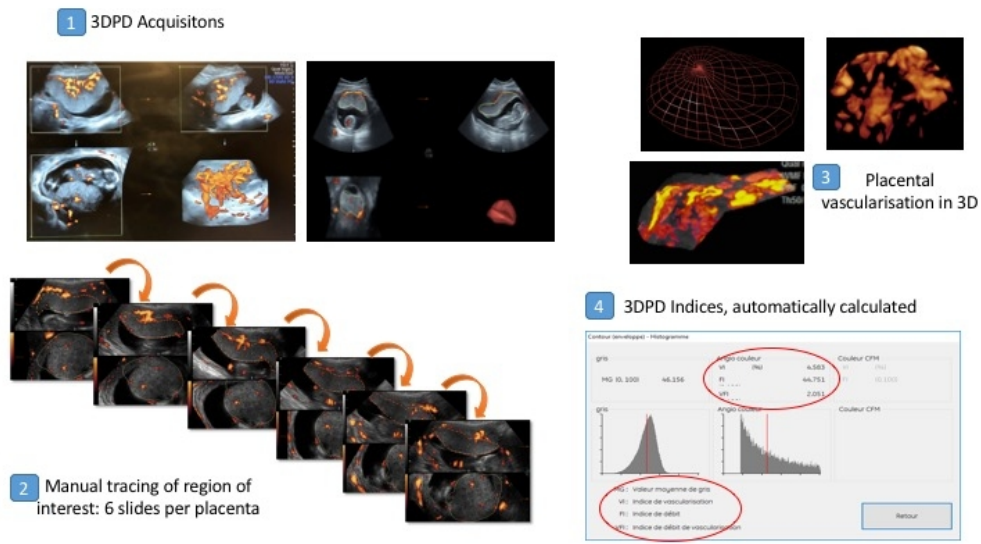

Figure 2: Three dimensional Power Doppler (3DPD) Analysis

338x190mm (54 x 54 DPI)

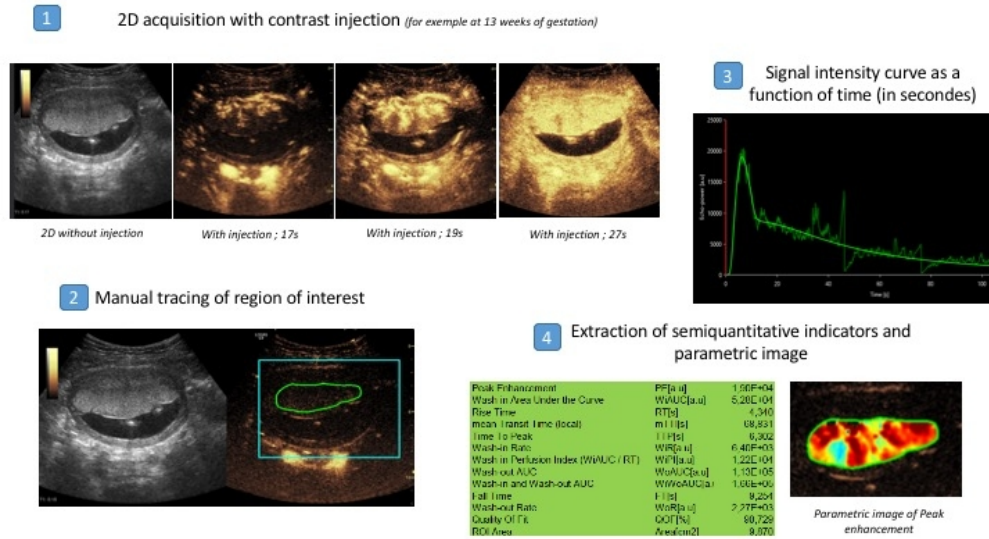

Figure 3: Contrast-enhanced Ultrasound (CEUS) Analysis

338x190mm (54 x 54 DPI)

1  
2  
3  
4  
5  
6  
7  
8  
9  
10  
11  
12  
13  
14  
15  
16  
17  
18  
19  
20  
21  
22  
23  
24  
25  
26  
27  
28  
29  
30  
31  
32  
33  
34  
35  
36  
37  
38  
39  
40  
41  
42  
43  
44  
45  
46  
47  
48  
49  
50  
51  
52  
53  
54  
55  
56  
57  
58  
59  
60

# BMJ Open

## Assessment of uteroplacental vascularisation in early first-trimester pregnancy with contrast-enhanced ultrasound and 3D power Doppler angiography: protocol for a multicentre prospective study (HOPE).

|                                 |                                                                                                                                                                                                                                                                                                                                                                                                                                                                                                                                                                                                                                                                                                                                                                                                                                                                                                                                                                                                                                                                                                                                                                              |
|---------------------------------|------------------------------------------------------------------------------------------------------------------------------------------------------------------------------------------------------------------------------------------------------------------------------------------------------------------------------------------------------------------------------------------------------------------------------------------------------------------------------------------------------------------------------------------------------------------------------------------------------------------------------------------------------------------------------------------------------------------------------------------------------------------------------------------------------------------------------------------------------------------------------------------------------------------------------------------------------------------------------------------------------------------------------------------------------------------------------------------------------------------------------------------------------------------------------|
| Journal:                        | <i>BMJ Open</i>                                                                                                                                                                                                                                                                                                                                                                                                                                                                                                                                                                                                                                                                                                                                                                                                                                                                                                                                                                                                                                                                                                                                                              |
| Manuscript ID                   | bmjopen-2019-030353.R1                                                                                                                                                                                                                                                                                                                                                                                                                                                                                                                                                                                                                                                                                                                                                                                                                                                                                                                                                                                                                                                                                                                                                       |
| Article Type:                   | Protocol                                                                                                                                                                                                                                                                                                                                                                                                                                                                                                                                                                                                                                                                                                                                                                                                                                                                                                                                                                                                                                                                                                                                                                     |
| Date Submitted by the Author:   | 13-Jun-2019                                                                                                                                                                                                                                                                                                                                                                                                                                                                                                                                                                                                                                                                                                                                                                                                                                                                                                                                                                                                                                                                                                                                                                  |
| Complete List of Authors:       | Bertholdt, Charline; Maternite Regionale Adolphe Pinard de Nancy, Obstetric and Fetal Medicine Unit, 10 rue du Docteur Heydenreich 54 000; CHU Nancy, Université de Lorraine, INSERM U1254, IADI, 54 000 ESZTO, Marie-Laure; CHR Metz-Thionville, Obstetric Department, Metz-Thionville Regional Hospital Center, Mercy Hospital, 1 Allée du Château 57085<br>TOURNIER, Mathilde; Maternite Regionale Adolphe Pinard de Nancy, Obstetric and Fetal Medicine Unit, 10 rue du Docteur Heydenreich 54 000 HOSSU, Gabriela; CHU Nancy, Université de Lorraine, INSERM U1254, IADI, 54 000 ; CHU Nancy, CHRU-Nancy, Inserm, Université de Lorraine, CIC, Innovation Technologique, 54 000<br>MELLOUKI, Naoual; CHR Metz-Thionville, Clinical Research Support Unit, Metz-Thionville Regional Hospital Center, Mercy Hospital, 1 Allée du Château 57085<br>CHERIFI, Aboubaker; CHU Nancy, CHRU-Nancy, Inserm, Université de Lorraine, CIC, Innovation Technologique, 54 000<br>MOREL, Olivier; Maternite Regionale Adolphe Pinard de Nancy, Obstetric and Fetal Medicine Unit, 10 rue du Docteur Heydenreich 54 000; CHU Nancy, Université de Lorraine, INSERM U1254, IADI, 54 000 |
| <b>Primary Subject Heading</b>: | Obstetrics and gynaecology                                                                                                                                                                                                                                                                                                                                                                                                                                                                                                                                                                                                                                                                                                                                                                                                                                                                                                                                                                                                                                                                                                                                                   |
| Secondary Subject Heading:      | Radiology and imaging                                                                                                                                                                                                                                                                                                                                                                                                                                                                                                                                                                                                                                                                                                                                                                                                                                                                                                                                                                                                                                                                                                                                                        |
| Keywords:                       | Ultrasonography < OBSTETRICS, Prenatal diagnosis < OBSTETRICS, Ultrasound < RADIOLOGY & IMAGING, Physiology < BASIC SCIENCES, Pathology < BASIC SCIENCES                                                                                                                                                                                                                                                                                                                                                                                                                                                                                                                                                                                                                                                                                                                                                                                                                                                                                                                                                                                                                     |
|                                 |                                                                                                                                                                                                                                                                                                                                                                                                                                                                                                                                                                                                                                                                                                                                                                                                                                                                                                                                                                                                                                                                                                                                                                              |

SCHOLARONE™  
Manuscripts

1  
2  
3 Assessment of uteroplacental vascularisation in early first-trimester  
4 pregnancy with contrast-enhanced ultrasound and 3D power Doppler  
5 angiography: protocol for a multicentre prospective study (HOPE).  
6  
7  
8  
9  
10

11 C.Bertholdt<sup>1,2</sup>, ML. Eszto<sup>3</sup>, M. Tournier<sup>1</sup>, G. Hossu<sup>2,4</sup>, N. Mellouki<sup>5</sup>, A. Cherifi<sup>4</sup>,  
12 O. Morel<sup>1,2</sup>  
13  
14  
15  
16  
17  
18

19 <sup>1</sup> Obstetric and Fetal Medicine Unit, Maternité CHRU de Nancy, 10 rue du Docteur Heydenreich 54 000  
20 NANCY, France  
21

22 <sup>2</sup> Université de Lorraine, INSERM U1254, IADI, 54 000 NANCY, France  
23

24 <sup>3</sup> Obstetric Department, Metz-Thionville Regional Hospital Center, Mercy Hospital, 1 Allée du Château 57085,  
25 Metz Cedex 03, France  
26

27 <sup>4</sup> CHRU-Nancy, Inserm, Université de Lorraine, CIC, Innovation Technologique, 54 000 NANCY, France  
28

29 <sup>5</sup> Clinical Research Support Unit, Metz-Thionville Regional Hospital Center, Mercy Hospital, 1 Allée du  
30 Château 57085, Metz Cedex 03, France  
31  
32  
33  
34  
35  
36

37 Corresponding author: C.Bertholdt

38 Obstetric and fetal medicine Unit

39 Maternité Régionale Universitaire, CHRU de Nancy

40 10 rue du Docteur Heydenreich

41 54000 NANCY

42 charline.bertholdt@gmail.com  
43  
44  
45  
46  
47  
48  
49  
50  
51  
52  
53  
54  
55  
56  
57  
58  
59  
60

## Abstract

Introduction: Knowledge about the mechanisms leading to the establishment of uteroplacental vascularisation is inadequate, and some of what has been thought to be known for decades has recently been challenged by a showing that the intervillous space, the major area of maternal-fetal exchange, appears to be perfused by maternal blood at as early as 6 weeks of gestation. The vascular flow then seems relatively constant until 13 weeks, when it appears to increase suddenly.

Objectives: The principal objective is to quantify the perfusion of the intervillous space by contrast-enhanced ultrasonography (CEUS) during the first-trimester at three different gestational ages (8, 11, and 13 weeks). The secondary objectives are to: (i) describe the indicators of vascularisation of the placenta (intervillous space) and the myometrium at the three gestational ages, measured by CEUS and 3D power Doppler (3DPD) angiography; (ii) compare the diagnostic performance of CEUS and 3DPD for the demonstration and quantification of uteroplacental vascularisation; and (iii) establish a biological collection of placentas to increase knowledge about placental development and functions during pregnancy.

Methods and Analysis: This is a prospective, cross-sectional, multicentre, non-randomised, open study. We will include 42 women with ongoing pregnancy and divided into three group of gestational ages (that is, 14 women by per group): 8, 11, and 13 weeks of gestation. 3DPD and then CEUS will be performed and the data about the perfusion kinetics and the 3DPD indices will be calculated and then compared with each other and for each gestational age.

Ethics and Dissemination: The appropriate French Ethics Committee Est III approved this study and the related consent forms on April 5, 2016, and the competent authority (ANSM) authorised the study on June 21, 2016. The results of this study will be published in a peer-reviewed journal and will be presented at relevant conferences.

### Strengths and limitations of this study

- The recent data will be confirmed in our study with a larger number of women.
- To our knowledge, this will be the first study comparing 3DPD with CEUS. Should the results demonstrate the value of 3DPD, studies with a longitudinal follow-up, that is, of ongoing pregnancies, could be conducted and would enable imaging data to be correlated with final pregnancy outcomes.
- The groups are selected by gestational age.
- The pathophysiologic interpretation of the data will be limited by the absence of information about pregnancy outcome.

## INTRODUCTION

Preeclampsia and intrauterine growth restriction (IUGR) are two principal complications of pregnancy that account for more than 30% of maternal and fetal morbidity and mortality. These diseases, which affect from 4 to 7% of pregnancies, are related to chronic uteroplacental hypoperfusion, and knowledge of its pathophysiologic mechanisms remains inadequate. Currently, the major hypothesis is that defective trophoblastic invasion during the first trimester leads to chronic uteroplacental hypoperfusion (1).

The mechanisms that establish uteroplacental vascularisation during the first trimester were described several decades ago, based on pathology studies, in the absence of functional imaging tools applicable *in vivo* in pregnant women(2,3). The presence of trophoblastic (also called endovascular) plugs in the spiral arteries was thought to prevent perfusion of the intervillous space until approximately 10 weeks of gestation, to enable the trophoblast to develop in a favourable hypoxic situation. More recently, ultrasound exploration seemingly confirming the absence of a Doppler signal before 12 weeks strengthened this hypothesis(4,5). Other work, notably histologic exploration of early-pregnancy hysterectomy specimens suggesting the absence of vascular "connection" before 8 weeks of gestation between the maternal network and the intervillous space and physiological explorations showing the maintenance of a hypoxic environment within the placenta up to 10 weeks of gestation also pointed in this direction at the beginning of this century (2,6).

On the other hand, the chronology and conditions leading to the disappearance of these plugs remained unknown. Based on this knowledge, it was suggested the origin of the chronic placental hypoperfusion phenomena observed in preeclampsia and intrauterine growth restriction might be the premature disappearance of these plugs and therefore the loss of the hypoxic environment (7–11).

This entire set of pathophysiologic hypotheses was called into question in 2017. Specifically, Roberts et al. (*Hum Reprod*, 2017) applied a modern technique of functional imaging — contrast-enhanced ultrasonography (CEUS) — to the placenta to show that the intervillous space was perfused by 6 weeks of gestation(12). They suggested in particular that the plugs disappear between 6 and 8 weeks.

This exploratory work thus presents major interest in terms of the physiological understanding of uteroplacental perfusion in the first trimester. Nonetheless, the study design and the number of pregnancies studied did not make it possible to go farther in understanding the quantitative course of this perfusion of the intervillous space. Accordingly, the authors observed quantitative modification of vascular flow within the intervillous space only starting at 13 weeks; they accordingly hypothesised that late remodelling of the radial arteries led to the reduction of vascular resistance. It is nonetheless also possible that the study lacked the power to show quantitative differences in vascular flow between 6 and 13 weeks.

These new data must imperatively be confirmed by other studies with more subjects, designed in principle with the objective of quantifying flow as a function of gestational age. The



demonstration of blood within the intervillous space at 6 weeks of gestation was possible through the use of an ultrasound contrast product, known to be strictly intravascular.

3D power Doppler (3DPD) angiography is another innovative technique for functional placental imaging. First described in 2004, it has the major interest of being usable in pregnant women because it has no teratogenic risk(13). It appears to present a major potential interest for the study of pathophysiologic phenomena associated with uteroplacental vascularisation(14,15). This technique, however, has only been assessed at a gestational age of 11 weeks (16). Its principal limitations are the absence of absolute specificity of the Doppler signal for blood flow and the impossibility of differentiating maternal and fetal flow. Accordingly, it would be interesting to assess whether 3DPD angiography might make it possible to quantify early perfusion of the intervillous space, by comparing it with CEUS, which is specific for maternal blood flow. If this is the case, contrast product would no longer be necessary for exploring uteroplacental vascularisation during pregnancy.

## **OBJECTIVE**

### *Primary objective*

The principal objective is to quantify the perfusion of the intervillous space by CEUS during the first trimester at three different gestational ages: 8, 11, and 13 weeks.

### *Secondary objectives*

- Describe the indicators of vascularisation of the placenta (intervillous space) and the myometrium at the three gestational ages, measured by CEUS and 3DPD.
- Compare the diagnostic performance of CEUS and 3DPD for the demonstration and quantification of uteroplacental vascularisation.
- Establish a biological collection of placentas to increase knowledge about placental development and functions during pregnancy.

## **METHODS**

### *Trial design*

Prospective, physiological, cross-sectional, multicentre, and non-randomised open study. This is a multicentre study including a level III university hospital centre (CHRU Nancy) and a level II regional hospital centre (CHR Metz).

### *Study population*

Table 1 presents the inclusion and non inclusion criteria and Figure 1 presents the flow chart of the study.

1  
2  
3 The participants in this study are women with ongoing pregnancy at the first-trimester. The  
4 analysis of uteroplacental vascularisation by CEUS can only be performed in contexts of  
5 elective abortion, as the contrast product is not authorised for use in ongoing pregnancies.  
6  
7

8 Before inclusion, the women will be informed of the aim, the procedures, and the predictable  
9 risks of the study (no identified clinical risk) by the principal investigator.  
10

### 11 *US acquisition*

12  
13 The ultrasound acquisition will begin in 2D mode by measurement of the crown-rump length  
14 to verify gestational age and study group. The position of the placenta will be noted and the  
15 Doppler spectrum of the uterine arteries, spiral arteries, and radial arteries will be recorded,  
16 with measurements of the pulsatility and resistance indices.  
17  
18

19 First, the 3D Doppler acquisitions will be performed at 4 different predetermined settings  
20 (impact of the settings currently underway: NCT03342014). The instrument used will be a  
21 Voluson S8 (General Electric Healthcare) with a volumetric convex abdominal transducer (4–  
22 8 MHz).  
23  
24

25 Next, the CEUS acquisitions will be performed with a Logiq E9 (General Electric Healthcare)  
26 and an abdominal transducer (1-5 MHz). The ultrasound contrast product used will be  
27 Sonovue® (Bracco Imaging, Italy), administered by bolus injection. A volume of 2.4 mL of  
28 contrast product will be injected per patient, and repeated once if necessary.  
29  
30

31 Settings and equipments are standardized between the two centers.  
32  
33

### 34 *Image analysis*

35  
36 3DPD angiography: The images will be analysed with VOCAL® software, which makes it  
37 possible to define a volume of interest and to quantify the Doppler signals to calculate the  
38 vascularisation indices (VI, FI, and VFI) automatically (Figure 2). Each volume will be  
39 recorded and analysed independently. Two regions of interest will be traced: one focused on  
40 the placenta and the other on the myometrium (placental bed).  
41  
42

43 CEUS: The images will be analysed with specific software that makes it possible to trace the  
44 regions of interest and to view the perfusion curves and to extract semiquantitative perfusion  
45 indicators from them (Figure 3).  
46  
47

### 48 *Placenta collection and analyses*

49  
50 The placentas will be collected and transferred fresh for preparation. The placental villi will  
51 be isolated and rinsed in saline solution. A portion of the villi (approximately 1 to 2 cm<sup>3</sup> of  
52 tissue) will be frozen at -80°C for the subsequent extraction of RNA and specific proteins. For  
53 an immunohistochemical analysis, a second portion will be fixed in buffered formalin for  
54 inclusion in paraffin and serial sections of 5-µm will be made on superfrost slides. The  
55 markers of oxidative stress will be specifically studied. The third portion will be fixed in  
56 formalin, diluted à 4%, and kept at 4°C in order to perform a confocal microscopic analysis.  
57  
58  
59  
60

1  
2  
3 All the villi will be collected and we consider that it is representative sampling of the  
4 placenta. However, it will be not possible to perform a spatial localization of the villi because  
5 placenta if surgically collected and as multiples parts.  
6  
7

### 8 *Outcomes*

9  
10 The principal endpoint is the measurement (in arbitrary units) of signal intensity in the  
11 intervillous space during the first trimester (at 8, 11, and 13 weeks), obtained by CEUS.  
12

13  
14 The secondary outcome measures are:

- 15 1. Measurement of indicators of vascularisation in the intervillous space and the myometrium:  
16 signal intensity and perfusion kinetics.
- 17 2. Comparison of the quantitative data about uteroplacental vascularisation obtained with each  
18 technique.
- 19 3. Procurement of placental villi that can be analysed to study human placental development  
20 and functions.  
21  
22

### 23 24 25 *Participant timeline*

26  
27 The enrolment of women began in October 2016. In view of the recruitment capacity of our  
28 institutions, the recruitment should be completed by November 2019.  
29

### 30 31 *Patient and public involvement*

32  
33 Patients and public were not involved.

### 34 35 *Premature ending of patient participation*

36  
37 Participants will be excluded from the study in the following situations:

- 38  
39 ▶ Lack of CEUS acquisition
- 40  
41 ▶ Withdrawal of consent before the end of the study.  
42

43  
44 Patients will be immediately excluded from the study and replaced with other new  
45 participants. Any decision to withdraw consent will not affect the patient's routine medical  
46 care. In the case of an adverse event related to the study, the patient will be informed and  
47 excluded. She will also receive what additional medical care is necessary or appropriate.  
48

### 49 50 *Follow-up*

51  
52 No specific follow-up has been planned for participants except for standard routine  
53 healthcare. Any adverse events will be noted and reported.  
54

### 55 56 *Sample size consideration*

57  
58 In view of recent data from the literature (Roberts, *Hum Reprod.* 2017), to show a difference  
59 in signal intensity between the three groups (8, 11, and 13 weeks) with  $\alpha$  (corrected for the  
60

multiple comparison) and  $\beta$  risks set respectively at 0.017 and 10%, we should have 14 women in each group at analysis, that is, 42 women in all.

#### *Data collection and management:*

An electronic case report file (e-CRF) will be created for each woman. The women's anonymity will be ensured by mentioning to the maximum extent possible their research code number, followed by the first letters of the last name and first name of the participant on all necessary documents or by deleting their names by appropriate means (white-out) from the copies of source documents intended to document the study.

The ultrasound data will be anonymised and transferred via a secure server for storage and archiving directly in the ARCHIMED database, reported to the CNIL (CNIL report number: 1410005) because they cannot be transcribed in the e-CRF. The clinical data concerning the woman collected are in Table 2.

#### *Statistical analysis*

The quantitative indicators will be described by their means  $\pm$  standard deviations, medians, and maximum and minimum values, the qualitative indicators by the number of individuals and percentages. The mean values will be compared between the groups by Student's t test or the Mann-Whitney test, matched or not, depending on the type of data. The comparison of imaging techniques will be completed by Bland-Altman plots.

The analyses will be performed with R software.

No interim analysis is planned.

No statistical criterion for stopping the study is planned.

### **QUALITY CONTROL**

#### *Right of access to data and source documents*

The medical data of each patient will only be transmitted to the sponsor (Metz-Thionville Regional Hospital Centre, CHR Metz-Thionville) or any person duly authorised by the sponsor and, where applicable, to the authorised health authorities, under conditions guaranteeing their confidentiality.

The sponsor and the regulatory authorities may request direct access to the medical file for verification of the procedures and/or data of the clinical trial, without violating confidentiality and within the limits permitted by laws and regulations.

For research purposes, the processing of personal data relating to persons undergoing research will be carried out.

These data are collected and processed solely on the basis of the legal grounds provided for by statute and regulations in the context of the performance of the public interest missions of the Metz-Thionville CHR, in particular those relating to ensuring and contributing to research

1  
2  
3 and innovation (Article 6.1.e of the GDPR, General Data Protection Regulation). The  
4 processing of personal data of persons participating in research is permitted by the exception  
5 provided for in Article 9.2(i) and (j).  
6

7  
8 This data processing is part of the MR001 reference methodology that the Metz-Thionville  
9 CHR has undertaken to respect.  
10

11 In accordance with the GDPR, persons participating in research have a right of access to their  
12 data (Article 15), a right of rectification (Article 16), a right to erase their data (right to forget)  
13 under the conditions provided for in Article 17, a right to limit the processing provided for in  
14 Article 18, and a right to object to the processing of their personal data (Article 21). These  
15 rights are exercised with the Investigators, who will inform the research sponsor as soon as  
16 possible.  
17  
18

19  
20 The persons participating in the research also have a right to complain to the supervisory  
21 authority in France, namely, the Commission Nationale de l'Informatique et des Libertés  
22 (CNIL).  
23

#### 24 *Study monitoring*

25  
26 The monitoring will be performed by the appropriate department of the Support Platform for  
27 Clinical Research (PARC) of CHR Metz-Thionville, throughout the study.  
28

29  
30 A Clinical Research Associate (CRA) will travel regularly to each centre to perform the  
31 quality control of the e-CRF data.  
32

33  
34 The CRA will verify that the research is conducted according to the protocol provided in  
35 accordance with regulations and will ensure that every e-CRF contains all of the information  
36 requested.  
37

38  
39 Each patient's e-CRF must be consistent with the source documents.  
40

41 The investigators will allocate adequate time for such monitoring activities. The investigators  
42 will also make sure that the monitor or other compliance or quality assurance reviewer is  
43 given access to all of the above noted study-related documents and study-related facilities  
44 (e.g. Ultrasound, diagnostic laboratory, etc.), and has adequate space to conduct the  
45 monitoring visits.  
46

#### 47 *Data management and quality control*

48  
49 Data management will be carried out by the clinical research team CIC-IT of Nancy  
50 (INSERM CIC 1433). The data images (ultrasound) will be automatically transferred to  
51 Nancy CIC-IT and stored after verification in the ArchiMed database declared to the French  
52 authorities (CNIL declaration number: 1410005).  
53

#### 54 *Patient data protection*

55  
56 Each patient must be identified on the e-CRF, ultrasound data, and placenta collection with  
57 her initials and identification number indicating her order of inclusion into the study. The  
58  
59  
60

1  
2  
3 investigators must keep the list of all the patients, including identification numbers, full names  
4 and last known addresses.  
5

6 Patients must be informed in writing about the possibility of audits by authorised  
7 representatives of the sponsor and/or regulatory authorities, in which case the relevant parts of  
8 study-related hospital records may be required.  
9  
10

11 Patients must also be informed that the results obtained will be computerised and analysed,  
12 that local laws will be applied, that their confidentiality will be preserved, and that they are  
13 entitled to obtain any information concerning the data stored and analysed by the  
14 computerised system.  
15  
16

### 17 **POTENTIAL RISKS RELATED TO THE STUDY**

18  
19 This study may expose the women participating in it to rare, transient, mild side effects. It will  
20 comply at all times with the Good Clinical Practices defined by the Ministry of Health.  
21  
22

23 The only constraint associated with the study is the addition of 3D Doppler acquisitions after  
24 the standard 2D ultrasound; these acquisitions will prolong the procedure by 10 minutes. The  
25 medical devices (Voluson® and Logiq E9®, GE Healthcare) are CE-marked and used  
26 routinely in clinical practice.  
27  
28

29 The contrast product (SonoVue®) is authorised for use in exploring lesions of the liver,  
30 breasts, and great vessels. It will be used according to the guidelines described in the  
31 summary of product characteristics in its French marketing authorisation. In the current state  
32 of knowledge about the safety of contrast products (which have not yet been authorised for  
33 use during pregnancy), adequate evidence exists to affirm their absence of permanent or  
34 serious adverse effects among women.  
35  
36

### 37 **ETHICAL PERMISSION**

38  
39 The sponsor and all investigators undertake to conduct this study in accordance with the  
40 Declaration of Helsinki (Ethical Principles for Medical Research Involving Human Subjects,  
41 Tokyo 2004) and its updates, the provisions of European Directive 2001/20-CE as transposed  
42 into French law by L. 2004-806 dated August 9, 2004, on public health policy and 2004-800  
43 dated August 6, 2004, on bioethics and their implementation decrees, and to comply with the  
44 guidelines of Good Clinical Practices (I.C.H. version 4 of May 1, 1996 and Decision of  
45 November 24, 2006).  
46  
47  
48  
49

50 They undertake to adhere to all legislative and regulatory provisions that may concern the  
51 research. In accordance with Article L. 1123-6 of the Public Health Code, the sponsor has  
52 submitted the research protocol the sponsor to the appropriate Committee for the Protection of  
53 Persons (CPP, Patient Protection Committee) Est III, which approved this study and the  
54 related consent forms on April 5, 2018 (Number 16.03.02). The competent authority (ANSM,  
55 Agence Nationale de Sécurité du Médicament et des Produits de Santé) authorised the study  
56 on June 21, 2018 (Number 160187A 12).  
57  
58  
59  
60

1  
2  
3 The study is registered under the number NCT02884297 on [clinicaltrials.gov](http://clinicaltrials.gov) and under the  
4 number 2015-005655-27 on EudraCT.  
5

6 The research is to be conducted in accordance with the present Protocol. The Investigators  
7 undertake to respect the protocol in all respects especially with regard to obtaining consent  
8 and the notification and follow-up of serious adverse events.  
9

### 10 *Information letter and informed consent*

11  
12  
13 Research participants will be informed of the objectives and constraints of the study, their  
14 rights to refuse to participate in the study, or to withdraw from the study at any time. When all  
15 essential information has been conveyed to the subject and the investigators have ensured that  
16 the patient has understood the implications of participating in the trial, the patient's written  
17 consent shall be obtained by an investigator in two original copies. A copy of the information  
18 forms and signed consents will be given to the patient.  
19

20  
21  
22 The investigator will retain the second copy for a minimum of 15 years.  
23

## 24 **PROTOCOL AMENDMENT**

25  
26  
27 The sponsor must be informed of any proposed amendment to the protocol by the  
28 coordinating investigator. The changes must be described, substantive or not.  
29

30  
31  
32 A substantial change is a change which is susceptible, in one way or another, to modify the  
33 assurances made to participants who consent to biomedical research (modification of an  
34 inclusion criterion, extending the inclusion period, participation of new centre, etc.).

35  
36  
37 Once the research has begun, any substantial modification thereof at the initiative of the  
38 sponsor must obtain, prior to its implementation, a favourable approval of the committee and  
39 an authorisation from the competent authority. In this case, if necessary, the committee  
40 ensures that a new consent from individuals participating in research is obtained.

41  
42  
43 Any substantial change requires that an authorisation request be made by the sponsor to the  
44 ANSM and/or a notification request by the CPP in accordance with legislative regulation n °  
45 2004-806 of August 9, 2004.

## 46 **FINAL RESEARCH REPORT**

47  
48  
49 The coordinator and the mandated biostatistician will collaboratively write the final research  
50 report. This report will be submitted to each of the investigators for review. Once consensus  
51 has been reached, the final version must be endorsed with the signature of each of the  
52 investigators and sent to the sponsor as early as possible after the effective end of the  
53 research. A report prepared according to the reference plan of the competent authority must be  
54 forwarded to the competent authority and the CPP within a year after the end of the research.  
55

## 56 **DISCUSSION**

57  
58  
59 This study is a follow-up to that recently published by Roberts et al.(12)  
60

1  
2  
3 Our first objective is to confirm their data, that is, the existence of early perfusion of the  
4 intervillous space (from 8 weeks of gestation) and an increase in vascular flow starting at 13  
5 weeks. We also seek to explore the course of vascular flow rates with gestational age to test  
6 both of the hypotheses advanced about the absence of modification of flow before 13 weeks:  
7 lack of power or external regulatory factors (remodelling of the radial arteries)?  
8  
9

10 To test the first hypothesis, we chose to increase the number of individuals in each group and  
11 to select three gestational age targets: 8, 11, and 13 weeks of gestation. A significant result  
12 between 8 and 13 weeks and between 11 and 13 weeks is expected and would thus confirm  
13 the data of Roberts et al. The intermediate group at 11 weeks was chosen arbitrarily and its  
14 size was calculated to be able to show a difference between 8 and 11 weeks.  
15  
16

17 To test the second hypothesis, and as Roberts & Frias have suggested, we will examine  
18 vascular resistance of the radial arteries at these different gestational ages and assess the level  
19 of correlation between the changes in resistance and in blood flow within the intervillous  
20 space (5,17,18).  
21  
22

23 The major difference between their study and ours is the choice of contrast product, a choice  
24 linked solely to the product available by geographic zone. They used Definity® while in  
25 Europe, we use Sonovue®. In principle this difference will have no effect on the comparison  
26 of our results, as their properties and performance are similar (19).  
27  
28

29 Moreover, we have chosen to perform 3DPD angiography at the same time to assess the  
30 applicability of this technique for the detection of blood flow before 11 weeks. The use of  
31 Doppler in the first trimester of pregnancy is a problem mainly when used with regard to the  
32 fetus. Indeed, the main hypothesis is the rise in temperature that can alter organogenesis and  
33 induce spontaneous malformations or miscarriages. In this study protocol, the acquisitions are  
34 focused on the placenta and on sections where the fetus is not visible. There is, therefore, no  
35 priori any fetal risk. Obviously, a safety assessment study will be needed before it is used in  
36 clinical practice. Should there be a high correlation between the 3DPD indices and the  
37 indicators of perfusion by CEUS, future studies will be able to choose only the 3DPD, which  
38 will make it possible to envision a longitudinal follow-up.  
39  
40

41 For placental analysis, we expect to perform a confocal microscopic analysis,  
42 immunohistochemical analysis and extraction of RNA and specific protein. We will consider  
43 to perform also an histomorfometric analysis as Rizzo et al. (20)  
44  
45  
46  
47  
48  
49  
50  
51  
52

53 Contributors: C.B. participated in study design and is carrying out or will carry out  
54 recruitment, Ultrasound acquisition, placental analysis, data analysis and manuscript writing.  
55 M.T. is carrying out or will carry out recruitment, ultrasound acquisition and data analysis.  
56 M.L.E. and O.M. are major investigators for clinical assessment, Ultrasound acquisition and  
57 study design. AC and NM are project managers. GH is in charge of statistical analysis. All  
58 authors read and approved the final manuscript.  
59  
60



1  
2  
3 Fundings: This study won the regional award for clinical research (2016).  
4

5 Competing interests: None declared  
6

7 Patient consent: Obtained  
8

9 Ethics approval: ANSM (the French National Agency for Medicines and Health Products  
10 Safety) and the Committee for the Protection of Persons (Comité de Protection des Personnes,  
11 CPP) approved this study.  
12  
13

14 Data sharing statement: All data generated during the project will be made freely available via  
15 CIC-IT, Nancy. Data obtained from this study will be deposited at CIC-IT Nancy where they  
16 will be maintained for a minimum of 15 years. There are no security, licensing or ethical  
17 issues related to the expected data, and all data used in the project will be generated directly  
18 as a result of the project, without any pre-existing data being used.  
19  
20

21 Trial status: This is an ongoing trial. Recruitment began in October 2016. We expect to  
22 complete recruitment by November 2019. We plan to publish final results in 2020.  
23  
24  
25  
26  
27  
28  
29  
30  
31  
32  
33  
34  
35  
36  
37  
38  
39  
40  
41  
42  
43  
44  
45  
46  
47  
48  
49  
50  
51  
52  
53  
54  
55  
56  
57  
58  
59  
60

## REFERENCES

1. Burton GJ, Jauniaux E. Pathophysiology of placental-derived fetal growth restriction. *Am J Obstet Gynecol*. 2018 Feb;218(2S):S745–61.
2. Jauniaux E, Watson A, Burton G. Evaluation of respiratory gases and acid-base gradients in human fetal fluids and uteroplacental tissue between 7 and 16 weeks' gestation. *Am J Obstet Gynecol*. 2001 Apr;184(5):998–1003.
3. Kurjak A, Kupesic S. Doppler assessment of the intervillous blood flow in normal and abnormal early pregnancy. *Obstet Gynecol*. 1997 Feb;89(2):252–6.
4. Carbillon L, Challier JC, Alouini S, Uzan M, Uzan S. Uteroplacental circulation development: Doppler assessment and clinical importance. *Placenta*. 2001 Nov;22(10):795–9.
5. Coppens M, Loquet P, Kollen M, De Neubourg F, Buytaert P. Longitudinal evaluation of uteroplacental and umbilical blood flow changes in normal early pregnancy. *Ultrasound Obstet Gynecol Off J Int Soc Ultrasound Obstet Gynecol*. 1996 Feb;7(2):114–21.
6. Burton GJ, Jauniaux E, Watson AL. Maternal arterial connections to the placental intervillous space during the first trimester of human pregnancy: the Boyd collection revisited. *Am J Obstet Gynecol*. 1999 Sep;181(3):718–24.
7. Greenwold N, Jauniaux E, Gulbis B, Hempstock J, Gervy C, Burton GJ. Relationship among maternal serum endocrinology, placental karyotype, and intervillous circulation in early pregnancy failure. *Fertil Steril*. 2003 Jun;79(6):1373–9.
8. Hempstock J, Jauniaux E, Greenwold N, Burton GJ. The contribution of placental oxidative stress to early pregnancy failure. *Hum Pathol*. 2003 Dec;34(12):1265–75.
9. Jauniaux E, Watson AL, Hempstock J, Bao YP, Skepper JN, Burton GJ. Onset of maternal arterial blood flow and placental oxidative stress. A possible factor in human early pregnancy failure. *Am J Pathol*. 2000 Dec;157(6):2111–22.
10. Jauniaux E, Burton GJ. [The role of oxidative stress in placental-related diseases of pregnancy]. *J Gynecol Obstet Biol Reprod (Paris)*. 2016 Oct;45(8):775–85.
11. Trophoblastic oxidative stress in relation to temporal and regional differences in maternal placental blood flow in normal and abnormal early pregn... - PubMed - NCBI [Internet]. [cited 2019 Mar 10]. Available from: <https://www.ncbi.nlm.nih.gov/pubmed/12507895>
12. Roberts VHJ, Morgan TK, Bednarek P, Morita M, Burton GJ, Lo JO, et al. Early first trimester uteroplacental flow and the progressive disintegration of spiral artery plugs: new insights from contrast-enhanced ultrasound and tissue histopathology. *Hum Reprod Oxf Engl*. 2017 Dec 1;32(12):2382–93.
13. Shih JC, Ko TL, Lin MC, Shyu MK, Lee CN, Hsieh FJ. Quantitative three-dimensional power Doppler ultrasound predicts the outcome of placental chorioangioma.

- 1  
2  
3 Ultrasound Obstet Gynecol Off J Int Soc Ultrasound Obstet Gynecol. 2004 Aug;24(2):202–6.  
4  
5 14. Duan J, Perdriolle-Galet E, Chabot-Lecoanet A-C, Callec R, Beaumont M, Chavatte-  
6 Palmer P, et al. [Placental 3D Doppler angiography: current and upcoming applications]. J  
7 Gynecol Obstet Biol Reprod (Paris). 2015 Feb;44(2):107–18.  
8  
9 15. Duan J, Chabot-Lecoanet A-C, Perdriolle-Galet E, Christov C, Hossu G, Cherifi A, et  
10 al. Utero-placental vascularisation in normal and preeclamptic and intra-uterine growth  
11 restriction pregnancies: third trimester quantification using 3D power Doppler with  
12 comparison to placental vascular morphology (EVUPA): a prospective controlled study. BMJ  
13 Open. 2016 Mar 31;6(3):e009909.  
14  
15 16. Hafner T, Kurjak A, Funduk-Kurjak B, Bekavac I. Assessment of early chorionic  
16 circulation by three-dimensional power Doppler. J Perinat Med. 2002;30(1):33–9.  
17  
18 17. Burton GJ, Woods AW, Jauniaux E, Kingdom JCP. Rheological and physiological  
19 consequences of conversion of the maternal spiral arteries for uteroplacental blood flow  
20 during human pregnancy. Placenta. 2009 Jun;30(6):473–82.  
21  
22 18. Kurjak A, Zudenigo D, Predanic M, Kupesic S, Funduk B. Assessment of the  
23 fetomaternal circulation in threatened abortion by transvaginal color Doppler. Fetal Diagn  
24 Ther. 1994 Oct;9(5):341–7.  
25  
26 19. Hyvelin J-M, Gaud E, Costa M, Helbert A, Bussat P, Bettinger T, et al. Characteristics  
27 and Echogenicity of Clinical Ultrasound Contrast Agents: An In Vitro and In Vivo  
28 Comparison Study. J Ultrasound Med Off J Am Inst Ultrasound Med. 2017 May;36(5):941–  
29 53.  
30  
31 20. Rizzo G, Silvestri E, Capponi A, Servadei F, Pietrolucci ME, Capece A, et al.  
32 Histomorphometric characteristics of first trimester chorionic villi in pregnancies with low  
33 serum pregnancy-associated plasma protein-A levels: relationship with placental three-  
34 dimensional power doppler ultrasonographic vascularization. J Matern-Fetal Neonatal Med  
35 Off J Eur Assoc Perinat Med Fed Asia Ocean Perinat Soc Int Soc Perinat Obstet. 2011  
36 Feb;24(2):253–7.  
37  
38  
39  
40  
41  
42  
43  
44  
45  
46  
47

### **Tables and Figures**

48  
49 Table 1 : Inclusion and non inclusion criteria

50  
51 Table 2 : Data collected

52  
53 Figure 1 : Flow Chart

54  
55 Figure 2 : Three dimensional Power Doppler (3DPD) Analysis

56  
57 Figure 3 : Contrast-enhanced Ultrasound (CEUS) Analysis  
58  
59  
60

1  
2  
3  
4  
5  
6  
7  
8  
9  
10  
11  
12  
13  
14  
15  
16  
17  
18  
19  
20  
21  
22  
23  
24  
25  
26  
27  
28  
29  
30  
31  
32  
33  
34  
35  
36  
37  
38  
39  
40  
41  
42  
43  
44  
45  
46  
47  
48  
49  
50  
51  
52  
53  
54  
55  
56  
57  
58  
59  
60

For peer review only

Table 1 : Inclusion and non inclusion criteria

| Inclusion criteria                                                                                                                                                                                                                                                                                                                                                                                                                  | Non inclusion criteria                                                                                                                                                                                                                                                                                                                                                                                                                                                              |
|-------------------------------------------------------------------------------------------------------------------------------------------------------------------------------------------------------------------------------------------------------------------------------------------------------------------------------------------------------------------------------------------------------------------------------------|-------------------------------------------------------------------------------------------------------------------------------------------------------------------------------------------------------------------------------------------------------------------------------------------------------------------------------------------------------------------------------------------------------------------------------------------------------------------------------------|
| <ul style="list-style-type: none"> <li>- Woman age <math>\geq</math> 18 years</li> <li>- Gestational age</li> <li><b>8 WG Group</b> : 8 to 8+6</li> <li><b>11 WG Group</b> : 11 to 11+6</li> <li><b>13 WG Group</b> : 13 to 13+6</li> <li>- Body Mass Index <math>\leq</math> 40 kg/m<sup>2</sup></li> <li>- Have given informed and written consent</li> <li>- Have confirmed her request of surgical elective abortion</li> </ul> | <ul style="list-style-type: none"> <li>- Contraindication to contrast injection :<br/>Hypersensitivity to sulfur hexafluoride or any of the other ingredients, history of cardiac disease, respiratory distress syndrome, severe pulmonary hypertension</li> <li>- Woman considered at risk of IUGR/PE :<br/>History of PE or IUGR, Autoimmune disease, Chronic High Blood Pressure, Diabetes</li> <li>- Woman unable to understand or follow the procedure of the study</li> </ul> |

Table 2 : Data collected

|                               |                                                                                                                                                                        |
|-------------------------------|------------------------------------------------------------------------------------------------------------------------------------------------------------------------|
| Family History                | Preeclampsia, intrauterine growth restriction, venous thromboembolic disease, high blood pressure, diabetes                                                            |
| Obstetrical History           | Parity, history of post-partum hemorrhage, history of pregnancy loss or intrauterine fetal death<br>Fibroma or uterine malformation                                    |
| Clinical data                 | Body Mass Index<br>Proteinuria<br>Blood pressure (systolic and diastolic)<br>Smoking                                                                                   |
| Current treatments            |                                                                                                                                                                        |
| Ultrasound and pregnancy data | Date of pregnancy ; Crown length crump (LCC), placental position, depth from the maternal abdomen, blood pressure and heart rate at the beginning of CEUS acquisition, |

Inclusion and written consent

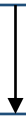

**2D Acquisitions**

**1/Crown Rump Length  
2/ Artery Doppler**

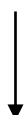

**3DPD Acquisitions**

**Different machines settings**

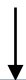

**CEUS Acquisitions**

**2,4mL of SonoVue®**

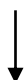

**Surgical abortion**

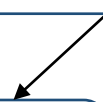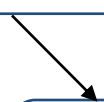

**Placenta collection and analysis**

**Post-processing of ultrasound data**

1  
2  
3  
4  
5  
6  
7  
8  
9  
10  
11  
12  
13  
14  
15  
16  
17  
18  
19  
20  
21  
22  
23  
24  
25  
26  
27  
28  
29  
30  
31  
32  
33  
34  
35  
36  
37  
38  
39  
40  
41

1 3DPD Acquisitions

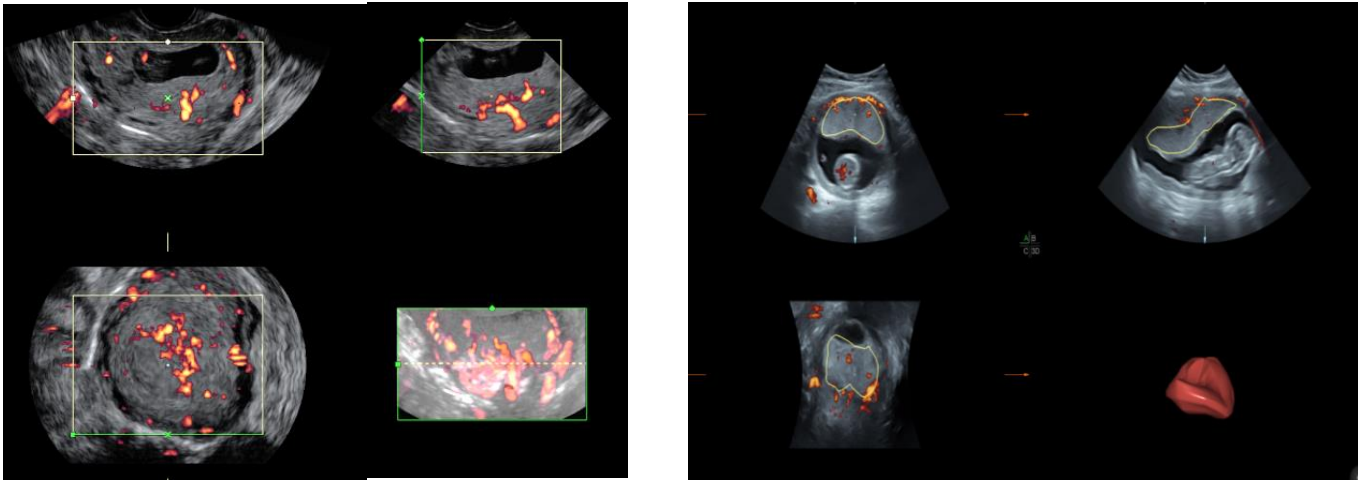

3 Placental vascularisation in 3D

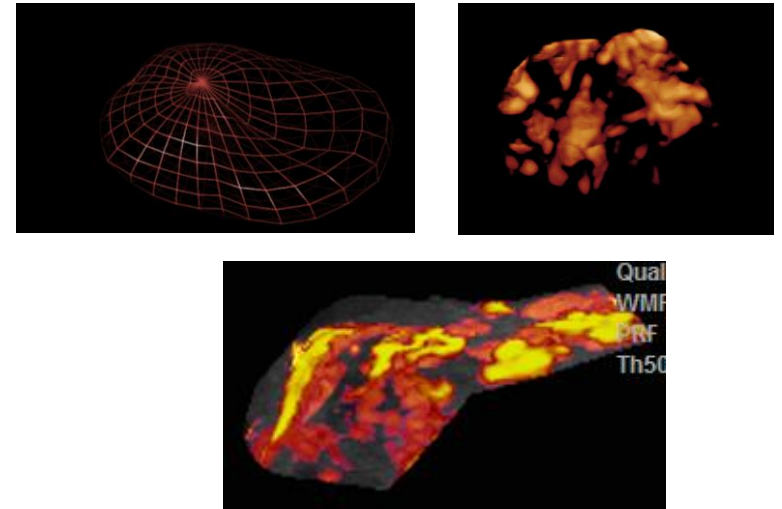

4 3DPD indices, automatically calculated

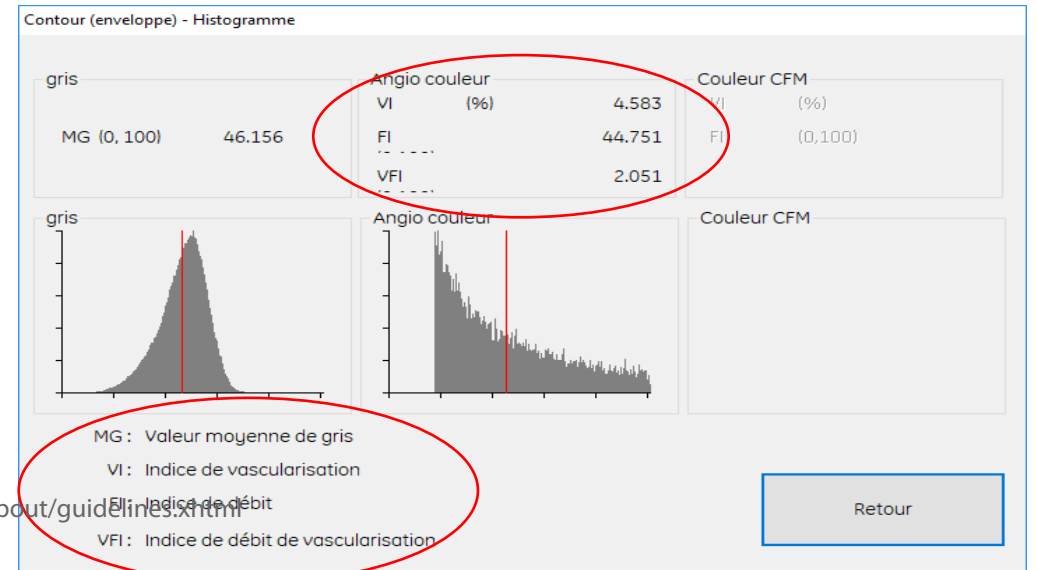

2 Manual tracing of region of interest: 6 slides per placenta

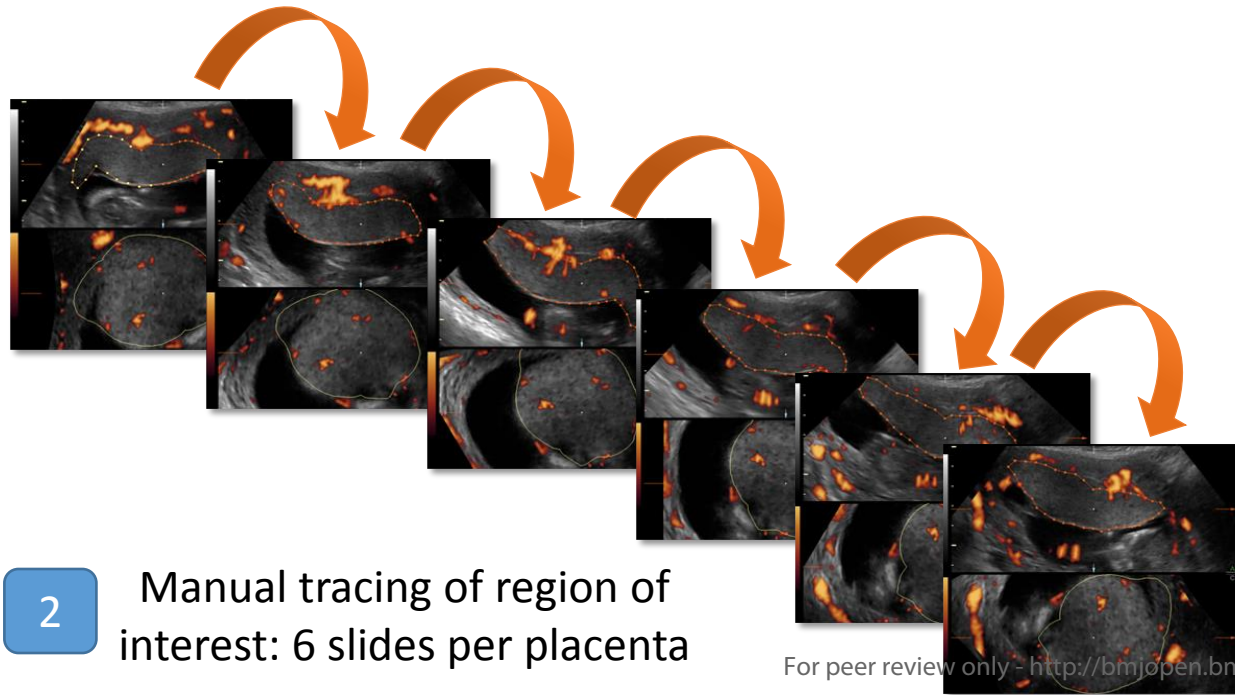

1  
2  
3  
4

1

## 2D acquisition with contrast injection (for exemple of 13 weeks of gestation)

3

## Signal intensity curves as a function of time (in secondes)

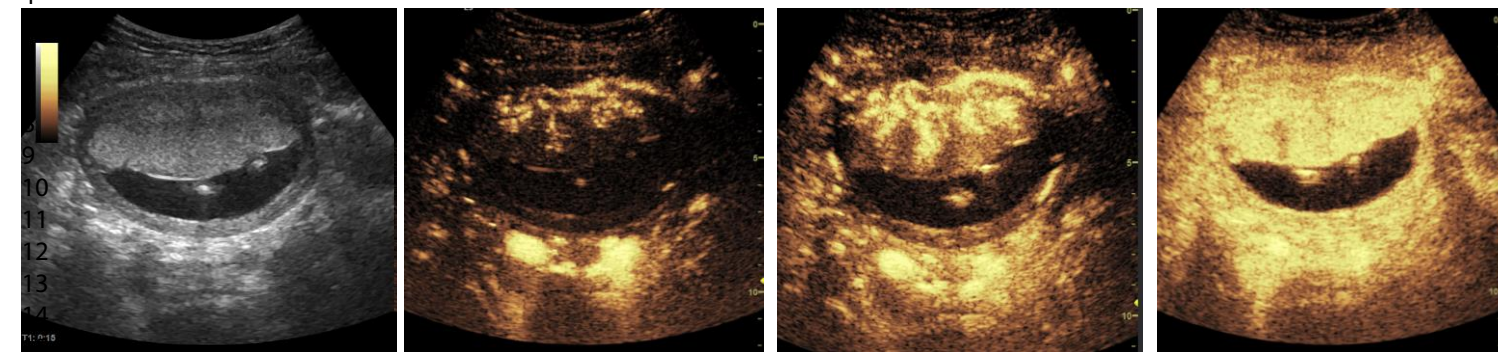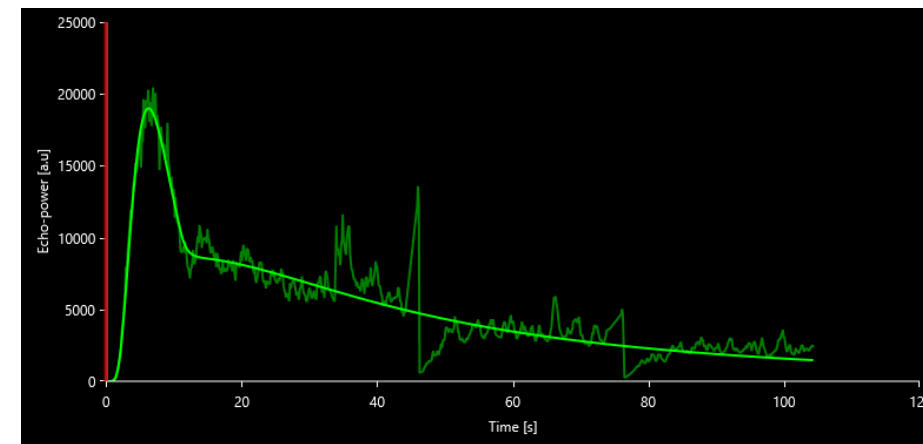

16 2D Without injection      With injection ; 17s      With injection ; 19s      With injection ; 27s

17  
18  
19  
20

2

## Manual tracing of region of interest

4

## Extraction of semiquantitative indicators and parametric image

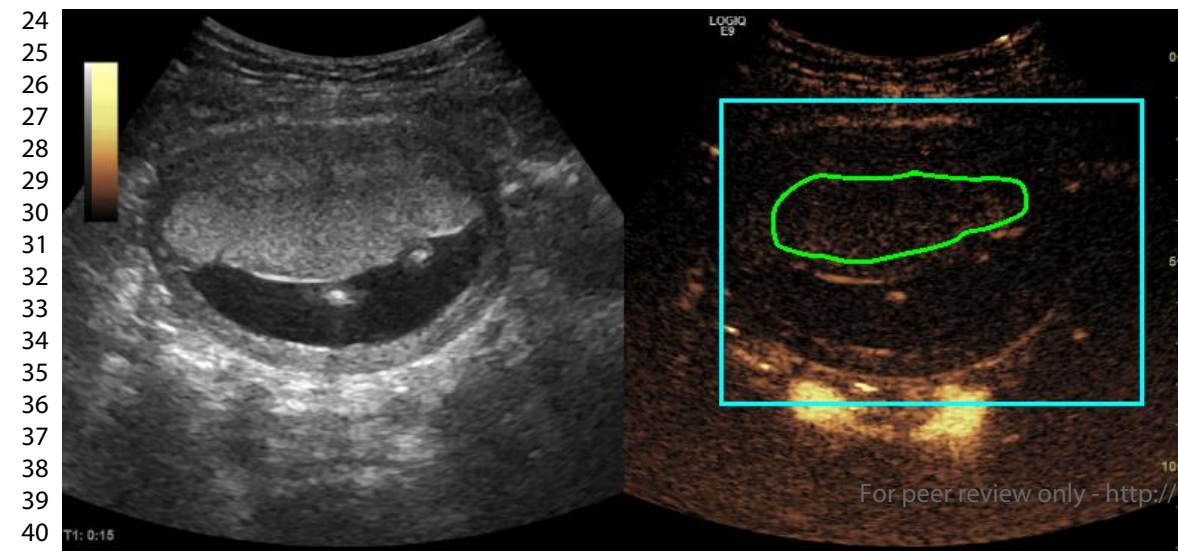

| PARAMETERS |                                            |              |          |
|------------|--------------------------------------------|--------------|----------|
| PE         | Peak Enhancement                           | ABSOLUTEROI1 |          |
| WiAUC      | Wash-in Area Under the Curve               | PE[a.u]      | 9,86E+03 |
| RT         | Rise Time                                  | WiAUC[a.u]   | 5,19E+04 |
| mTTI       | mean Transit Time (local)                  | RT[s]        | 8,065    |
| TTP        | Time To Peak                               | mTTI[s]      | 148,891  |
| WiR        | Wash-in Rate                               | TTP[s]       | 10,662   |
| WiPI       | Wash-in Perfusion Index (WiAUC / WiR[a.u]) | WiPI[a.u]    | 1,88E+03 |
| WoAUC      | Wash-out AUC                               | WoAUC[a.u]   | 1,30E+05 |
| WiWoAUC    | Wash-in and Wash-out AUC                   | WiWoAUC[     | 1,82E+05 |
| FT         | Fall Time                                  | FT[s]        | 19,599   |
| WoR        | Wash-out Rate                              | WoR[a.u]     | 5,51E+02 |
| QOF        | Quality Of Fit                             | QOF[%]       | 89,227   |
| Area       | ROI Area                                   | Area[cm2]    | 4,662    |

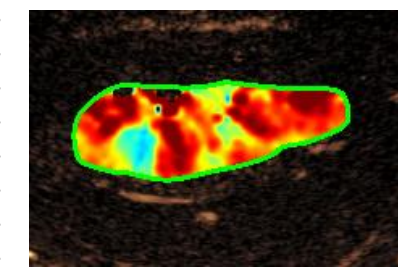

Parametric image of Peak enhancement



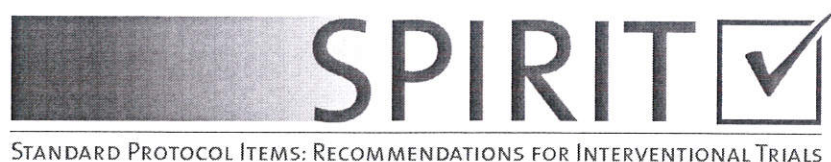

SPIRIT 2013 Checklist: Recommended items to address in a clinical trial protocol and related documents\*

| Section/item                      | Item No                    | Description                                                                                                                                                                                                                                                                                 |
|-----------------------------------|----------------------------|---------------------------------------------------------------------------------------------------------------------------------------------------------------------------------------------------------------------------------------------------------------------------------------------|
| <b>Administrative information</b> |                            |                                                                                                                                                                                                                                                                                             |
| 16 <i>page 1</i>                  | Title                      | 1 Descriptive title identifying the study design, population, interventions, and, if applicable, trial acronym                                                                                                                                                                              |
| 19 <i>p 9</i>                     | Trial registration         | 2a Trial identifier and registry name. If not yet registered, name of intended registry                                                                                                                                                                                                     |
|                                   |                            | 2b All items from the World Health Organization Trial Registration Data Set                                                                                                                                                                                                                 |
| 25 <i>PM</i>                      | Protocol version           | 3 Date and version identifier                                                                                                                                                                                                                                                               |
| 27 <i>PM</i>                      | Funding                    | 4 Sources and types of financial, material, and other support                                                                                                                                                                                                                               |
| 30 <i>P 1</i>                     | Roles and responsibilities | 5a Names, affiliations, and roles of protocol contributors                                                                                                                                                                                                                                  |
| 31 <i>PM</i>                      |                            | 5b Name and contact information for the trial sponsor                                                                                                                                                                                                                                       |
|                                   |                            | 5c Role of study sponsor and funders, if any, in study design; collection, management, analysis, and interpretation of data; writing of the report; and the decision to submit the report for publication, including whether they will have ultimate authority over any of these activities |
|                                   |                            | 5d Composition, roles, and responsibilities of the coordinating centre, steering committee, endpoint adjudication committee, data management team, and other individuals or groups overseeing the trial, if applicable (see Item 21a for data monitoring committee)                         |
| <b>Introduction</b>               |                            |                                                                                                                                                                                                                                                                                             |
| 47 <i>p 3-4</i>                   | Background and rationale   | 6a Description of research question and justification for undertaking the trial, including summary of relevant studies (published and unpublished) examining benefits and harms for each intervention                                                                                       |
|                                   |                            | 6b Explanation for choice of comparators                                                                                                                                                                                                                                                    |
| 54 <i>p 4</i>                     | Objectives                 | 7 Specific objectives or hypotheses                                                                                                                                                                                                                                                         |
| 56 <i>p 4</i>                     | Trial design               | 8 Description of trial design including type of trial (eg, parallel group, crossover, factorial, single group), allocation ratio, and framework (eg, superiority, equivalence, noninferiority, exploratory)                                                                                 |

|    |                |     |                                                                         |
|----|----------------|-----|-------------------------------------------------------------------------|
| 1  |                |     |                                                                         |
| 2  | Allocation     | 16b | Mechanism of implementing the allocation sequence (eg, central          |
| 3  | concealment    |     | telephone; sequentially numbered, opaque, sealed envelopes),            |
| 4  | mechanism      |     | describing any steps to conceal the sequence until interventions are    |
| 5  |                |     | assigned                                                                |
| 6  |                |     |                                                                         |
| 7  | Implementation | 16c | Who will generate the allocation sequence, who will enrol participants, |
| 8  |                |     | and who will assign participants to interventions                       |
| 9  |                |     |                                                                         |
| 10 | Blinding       | 17a | Who will be blinded after assignment to interventions (eg, trial        |
| 11 | (masking)      |     | participants, care providers, outcome assessors, data analysts), and    |
| 12 |                |     | how                                                                     |
| 13 |                |     |                                                                         |
| 14 |                |     |                                                                         |
| 15 |                | 17b | If blinded, circumstances under which unblinding is permissible, and    |
| 16 |                |     | procedure for revealing a participant's allocated intervention during   |
| 17 |                |     | the trial                                                               |
| 18 |                |     |                                                                         |

### Methods: Data collection, management, and analysis

|    |                            |     |                                                                          |
|----|----------------------------|-----|--------------------------------------------------------------------------|
| 21 |                            |     |                                                                          |
| 22 | Data collection<br>methods | 18a | Plans for assessment and collection of outcome, baseline, and other      |
| 23 |                            |     | trial data, including any related processes to promote data quality (eg, |
| 24 |                            |     | duplicate measurements, training of assessors) and a description of      |
| 25 |                            |     | study instruments (eg, questionnaires, laboratory tests) along with      |
| 26 |                            |     | their reliability and validity, if known. Reference to where data        |
| 27 |                            |     | collection forms can be found, if not in the protocol                    |
| 28 |                            |     |                                                                          |
| 29 |                            | 18b | Plans to promote participant retention and complete follow-up,           |
| 30 |                            |     | including list of any outcome data to be collected for participants who  |
| 31 |                            |     | discontinue or deviate from intervention protocols                       |
| 32 |                            |     |                                                                          |
| 33 |                            |     |                                                                          |
| 34 | Data<br>management         | 19  | Plans for data entry, coding, security, and storage, including any       |
| 35 |                            |     | related processes to promote data quality (eg, double data entry;        |
| 36 |                            |     | range checks for data values). Reference to where details of data        |
| 37 |                            |     | management procedures can be found, if not in the protocol               |
| 38 |                            |     |                                                                          |
| 39 |                            |     |                                                                          |
| 40 | Statistical<br>methods     | 20a | Statistical methods for analysing primary and secondary outcomes.        |
| 41 |                            |     | Reference to where other details of the statistical analysis plan can be |
| 42 |                            |     | found, if not in the protocol                                            |
| 43 |                            |     |                                                                          |
| 44 |                            | 20b | Methods for any additional analyses (eg, subgroup and adjusted           |
| 45 |                            |     | analyses)                                                                |
| 46 |                            |     |                                                                          |
| 47 |                            | 20c | Definition of analysis population relating to protocol non-adherence     |
| 48 |                            |     | (eg, as randomised analysis), and any statistical methods to handle      |
| 49 |                            |     | missing data (eg, multiple imputation)                                   |
| 50 |                            |     |                                                                          |
| 51 |                            |     |                                                                          |

### Methods: Monitoring

|    |                 |     |                                                                      |
|----|-----------------|-----|----------------------------------------------------------------------|
| 52 |                 |     |                                                                      |
| 53 |                 |     |                                                                      |
| 54 | Data monitoring | 21a | Composition of data monitoring committee (DMC); summary of its role  |
| 55 |                 |     | and reporting structure; statement of whether it is independent from |
| 56 |                 |     | the sponsor and competing interests; and reference to where further  |
| 57 |                 |     | details about its charter can be found, if not in the protocol.      |
| 58 |                 |     | Alternatively, an explanation of why a DMC is not needed             |
| 59 |                 |     |                                                                      |
| 60 |                 |     |                                                                      |

## Appendices

|                            |    |                                                                                                                                                                                                |
|----------------------------|----|------------------------------------------------------------------------------------------------------------------------------------------------------------------------------------------------|
| Informed consent materials | 32 | Model consent form and other related documentation given to participants and authorised surrogates                                                                                             |
| Biological specimens       | 33 | Plans for collection, laboratory evaluation, and storage of biological specimens for genetic or molecular analysis in the current trial and for future use in ancillary studies, if applicable |

---

\*It is strongly recommended that this checklist be read in conjunction with the SPIRIT 2013 Explanation & Elaboration for important clarification on the items. Amendments to the protocol should be tracked and dated. The SPIRIT checklist is copyrighted by the SPIRIT Group under the Creative Commons "Attribution-NonCommercial-NoDerivs 3.0 Unported" license.

# BMJ Open

**Assessment of uteroplacental vascularisation in early first-trimester pregnancy with contrast-enhanced ultrasound and 3D power Doppler angiography: protocol for a prospective, cross-sectional, multicentre, non-randomised open study (HOPE).**

|                                 |                                                                                                                                                                                                                                                                                                                                                                                                                                                                                                                                                                                                                                                                                                                                                                                                                                                                                                                                                                                                                                                                                                                                                                                    |
|---------------------------------|------------------------------------------------------------------------------------------------------------------------------------------------------------------------------------------------------------------------------------------------------------------------------------------------------------------------------------------------------------------------------------------------------------------------------------------------------------------------------------------------------------------------------------------------------------------------------------------------------------------------------------------------------------------------------------------------------------------------------------------------------------------------------------------------------------------------------------------------------------------------------------------------------------------------------------------------------------------------------------------------------------------------------------------------------------------------------------------------------------------------------------------------------------------------------------|
| Journal:                        | <i>BMJ Open</i>                                                                                                                                                                                                                                                                                                                                                                                                                                                                                                                                                                                                                                                                                                                                                                                                                                                                                                                                                                                                                                                                                                                                                                    |
| Manuscript ID                   | bmjopen-2019-030353.R2                                                                                                                                                                                                                                                                                                                                                                                                                                                                                                                                                                                                                                                                                                                                                                                                                                                                                                                                                                                                                                                                                                                                                             |
| Article Type:                   | Protocol                                                                                                                                                                                                                                                                                                                                                                                                                                                                                                                                                                                                                                                                                                                                                                                                                                                                                                                                                                                                                                                                                                                                                                           |
| Date Submitted by the Author:   | 11-Jul-2019                                                                                                                                                                                                                                                                                                                                                                                                                                                                                                                                                                                                                                                                                                                                                                                                                                                                                                                                                                                                                                                                                                                                                                        |
| Complete List of Authors:       | Bertholdt, Charline; Maternite Regionale Adolphe Pinard de Nancy, Obstetric and Fetal Medicine Unit, 10 rue du Docteur Heydenreich 54 000; CHU Nancy, Université de Lorraine, INSERM U1254, IADI, 54 000<br>ESZTO, Marie-Laure; CHR Metz-Thionville, Obstetric Department, Metz-Thionville Regional Hospital Center, Mercy Hospital, 1 Allée du Château 57085<br>TOURNIER, Mathilde; Maternite Regionale Adolphe Pinard de Nancy, Obstetric and Fetal Medicine Unit, 10 rue du Docteur Heydenreich 54 000<br>HOSSU, Gabriela; CHU Nancy, Université de Lorraine, INSERM U1254, IADI, 54 000 ; CHU Nancy, CHRU-Nancy, Inserm, Université de Lorraine, CIC, Innovation Technologique, 54 000<br>MELLOUKI, Naoual; CHR Metz-Thionville, Clinical Research Support Unit, Metz-Thionville Regional Hospital Center, Mercy Hospital, 1 Allée du Château 57085<br>CHERIFI, Aboubaker; CHU Nancy, CHRU-Nancy, Inserm, Université de Lorraine, CIC, Innovation Technologique, 54 000<br>MOREL, Olivier; Maternite Regionale Adolphe Pinard de Nancy, Obstetric and Fetal Medicine Unit, 10 rue du Docteur Heydenreich 54 000; CHU Nancy, Université de Lorraine, INSERM U1254, IADI, 54 000 |
| <b>Primary Subject Heading</b>: | Obstetrics and gynaecology                                                                                                                                                                                                                                                                                                                                                                                                                                                                                                                                                                                                                                                                                                                                                                                                                                                                                                                                                                                                                                                                                                                                                         |
| Secondary Subject Heading:      | Radiology and imaging                                                                                                                                                                                                                                                                                                                                                                                                                                                                                                                                                                                                                                                                                                                                                                                                                                                                                                                                                                                                                                                                                                                                                              |
| Keywords:                       | Ultrasonography < OBSTETRICS, Prenatal diagnosis < OBSTETRICS, Ultrasound < RADIOLOGY & IMAGING, Physiology < BASIC SCIENCES, Pathology < BASIC SCIENCES                                                                                                                                                                                                                                                                                                                                                                                                                                                                                                                                                                                                                                                                                                                                                                                                                                                                                                                                                                                                                           |
|                                 |                                                                                                                                                                                                                                                                                                                                                                                                                                                                                                                                                                                                                                                                                                                                                                                                                                                                                                                                                                                                                                                                                                                                                                                    |

SCHOLARONE™  
Manuscripts

1  
2  
3 Assessment of uteroplacental vascularisation in early first-trimester  
4 pregnancy with contrast-enhanced ultrasound and 3D power Doppler  
5 angiography: protocol for a prospective, cross-sectional, multicentre  
6 non-randomised open study (HOPE).  
7  
8  
9

10  
11  
12  
13 C.Bertholdt<sup>1,2</sup>, ML. Eszto<sup>3</sup>, M. Tournier<sup>1</sup>, G. Hossu<sup>2,4</sup>, N. Mellouki<sup>5</sup>, A. Cherifi<sup>4</sup>,  
14 O. Morel<sup>1,2</sup>  
15  
16

17  
18  
19  
20  
21 <sup>1</sup> Obstetric and Fetal Medicine Unit, Maternité CHRU de Nancy, 10 rue du Docteur Heydenreich 54 000  
22 NANCY, France  
23

24 <sup>2</sup> Université de Lorraine, INSERM U1254, IADI, 54 000 NANCY, France  
25

26 <sup>3</sup> Obstetric Department, Metz-Thionville Regional Hospital Center, Mercy Hospital, 1 Allée du Château 57085,  
27 Metz Cedex 03, France  
28

29 <sup>4</sup> CHRU-Nancy, Inserm, Université de Lorraine, CIC, Innovation Technologique, 54 000 NANCY, France  
30

31 <sup>5</sup> Clinical Research Support Unit, Metz-Thionville Regional Hospital Center, Mercy Hospital, 1 Allée du  
32 Château 57085, Metz Cedex 03, France  
33  
34  
35  
36  
37

38 Corresponding author: C.Bertholdt  
39

40 Obstetric and fetal medicine Unit  
41

42 Maternité Régionale Universitaire, CHRU de Nancy  
43

44 10 rue du Docteur Heydenreich  
45

46 54000 NANCY  
47

48 charline.bertholdt@gmail.com  
49  
50  
51  
52  
53  
54  
55  
56  
57  
58  
59  
60

## Abstract

Introduction: Knowledge about the mechanisms leading to the establishment of uteroplacental vascularisation is inadequate, and some of what has been thought to be known for decades has recently been challenged by a showing that the intervillous space, the major area of maternal-fetal exchange, appears to be perfused by maternal blood at as early as 6 weeks of gestation. The vascular flow then seems relatively constant until 13 weeks, when it appears to increase suddenly.

Objectives: The principal objective is to quantify the perfusion of the intervillous space by contrast-enhanced ultrasonography (CEUS) during the first-trimester at three different gestational ages (8, 11, and 13 weeks). The secondary objectives are to: (i) describe the indicators of vascularisation of the placenta (intervillous space) and the myometrium at the three gestational ages, measured by CEUS and 3D power Doppler (3DPD) angiography; (ii) compare the diagnostic performance of CEUS and 3DPD for the demonstration and quantification of uteroplacental vascularisation; and (iii) establish a biological collection of placentas to increase knowledge about placental development and functions during pregnancy.

Methods and Analysis: This is a prospective, cross-sectional, multicentre, non-randomised, open study. We will include 42 women with ongoing pregnancy and divided into three group of gestational ages (that is, 14 women by per group): 8, 11, and 13 weeks of gestation. 3DPD and then CEUS will be performed and the data about the perfusion kinetics and the 3DPD indices will be calculated and then compared with each other and for each gestational age.

Ethics and Dissemination: The appropriate French Ethics Committee Est III approved this study and the related consent forms on April 5, 2016, and the competent authority (ANSM) authorised the study on June 21, 2016. The results of this study will be published in a peer-reviewed journal and will be presented at relevant conferences.

### Strengths and limitations of this study

- The recent data will be confirmed in our study with a larger number of women.
- To our knowledge, this will be the first study comparing 3DPD with CEUS. Should the results demonstrate the value of 3DPD, studies with a longitudinal follow-up, that is, of ongoing pregnancies, could be conducted and would enable imaging data to be correlated with final pregnancy outcomes.
- The groups are selected by gestational age.
- The pathophysiologic interpretation of the data will be limited by the absence of information about pregnancy outcome.

## INTRODUCTION

Preeclampsia and intrauterine growth restriction (IUGR) are two principal complications of pregnancy that account for more than 30% of maternal and fetal morbidity and mortality. These diseases, which affect from 4 to 7% of pregnancies, are related to chronic uteroplacental hypoperfusion, and knowledge of its pathophysiologic mechanisms remains inadequate. Currently, the major hypothesis is that defective trophoblastic invasion during the first trimester leads to chronic uteroplacental hypoperfusion (1).

The mechanisms that establish uteroplacental vascularisation during the first trimester were described several decades ago, based on pathology studies, in the absence of functional imaging tools applicable *in vivo* in pregnant women(2,3). The presence of trophoblastic (also called endovascular) plugs in the spiral arteries was thought to prevent perfusion of the intervillous space until approximately 10 weeks of gestation, to enable the trophoblast to develop in a favourable hypoxic situation. More recently, ultrasound exploration seemingly confirming the absence of a Doppler signal before 12 weeks strengthened this hypothesis(4,5). Other work, notably histologic exploration of early-pregnancy hysterectomy specimens suggesting the absence of vascular "connection" before 8 weeks of gestation between the maternal network and the intervillous space and physiological explorations showing the maintenance of a hypoxic environment within the placenta up to 10 weeks of gestation also pointed in this direction at the beginning of this century (2,6).

On the other hand, the chronology and conditions leading to the disappearance of these plugs remained unknown. Based on this knowledge, it was suggested the origin of the chronic placental hypoperfusion phenomena observed in preeclampsia and intrauterine growth restriction might be the premature disappearance of these plugs and therefore the loss of the hypoxic environment (7–11).

This entire set of pathophysiologic hypotheses was called into question in 2017. Specifically, Roberts et al. (*Hum Reprod*, 2017) applied a modern technique of functional imaging — contrast-enhanced ultrasonography (CEUS) — to the placenta to show that the intervillous space was perfused by 6 weeks of gestation(12). They suggested in particular that the plugs disappear between 6 and 8 weeks.

This exploratory work thus presents major interest in terms of the physiological understanding of uteroplacental perfusion in the first trimester. Nonetheless, the study design and the number of pregnancies studied did not make it possible to go farther in understanding the quantitative course of this perfusion of the intervillous space. Accordingly, the authors observed quantitative modification of vascular flow within the intervillous space only starting at 13 weeks; they accordingly hypothesised that late remodelling of the radial arteries led to the reduction of vascular resistance. It is nonetheless also possible that the study lacked the power to show quantitative differences in vascular flow between 6 and 13 weeks.

These new data must imperatively be confirmed by other studies with more subjects, designed in principle with the objective of quantifying flow as a function of gestational age. The

demonstration of blood within the intervillous space at 6 weeks of gestation was possible through the use of an ultrasound contrast product, known to be strictly intravascular.

3D power Doppler (3DPD) angiography is another innovative technique for functional placental imaging. First described in 2004, it has the major interest of being usable in pregnant women because it has no teratogenic risk(13). It appears to present a major potential interest for the study of pathophysiologic phenomena associated with uteroplacental vascularisation(14,15). This technique, however, has only been assessed at a gestational age of 11 weeks (16). Its principal limitations are the absence of absolute specificity of the Doppler signal for blood flow and the impossibility of differentiating maternal and fetal flow. Accordingly, it would be interesting to assess whether 3DPD angiography might make it possible to quantify early perfusion of the intervillous space, by comparing it with CEUS, which is specific for maternal blood flow. If this is the case, contrast product would no longer be necessary for exploring uteroplacental vascularisation during pregnancy.

## **OBJECTIVE**

### *Primary objective*

The principal objective is to quantify the perfusion of the intervillous space by CEUS during the first trimester at three different gestational ages: 8, 11, and 13 weeks.

### *Secondary objectives*

- Describe the indicators of vascularisation of the placenta (intervillous space) and the myometrium at the three gestational ages, measured by CEUS and 3DPD.
- Compare the diagnostic performance of CEUS and 3DPD for the demonstration and quantification of uteroplacental vascularisation.
- Establish a biological collection of placentas to increase knowledge about placental development and functions during pregnancy.

## **METHODS**

### *Trial design*

Prospective, physiological, cross-sectional, multicentre, and non-randomised open study. This is a multicentre study including a level III university hospital centre (CHRU Nancy) and a level II regional hospital centre (CHR Metz).

### *Study population*

Table 1 presents the inclusion and non inclusion criteria and Figure 1 presents the flow chart of the study.



1  
2  
3 The participants in this study are women with ongoing pregnancy at the first-trimester. The  
4 analysis of uteroplacental vascularisation by CEUS can only be performed in contexts of  
5 elective abortion, as the contrast product is not authorised for use in ongoing pregnancies.  
6  
7

8 Before inclusion, the women will be informed of the aim, the procedures, and the predictable  
9 risks of the study (no identified clinical risk) by the principal investigator.  
10

### 11 *US acquisition*

12  
13 The ultrasound acquisition will begin in 2D mode by measurement of the crown-rump length  
14 to verify gestational age and study group. The position of the placenta will be noted and the  
15 Doppler spectrum of the uterine arteries, spiral arteries, and radial arteries will be recorded,  
16 with measurements of the pulsatility and resistance indices.  
17  
18

19  
20 First, the 3D Doppler acquisitions will be performed at 4 different predetermined settings  
21 (impact of the settings currently underway: NCT03342014). The instrument used will be a  
22 Voluson S8 (General Electric Healthcare) with a volumetric convex abdominal transducer (4–  
23 8 MHz).  
24

25  
26 Next, the CEUS acquisitions will be performed with a Logiq E9 (General Electric Healthcare)  
27 and an abdominal transducer (1-5 MHz). The ultrasound contrast product used will be  
28 Sonovue® (Bracco Imaging, Italy), administered by bolus injection. A volume of 2.4 mL of  
29 contrast product will be injected per patient, and repeated once if necessary.  
30

31  
32 Settings and equipments are standardized between the two centers.  
33

### 34 *Image analysis*

35  
36 3DPD angiography: The images will be analysed with VOCAL® software, which makes it  
37 possible to define a volume of interest and to quantify the Doppler signals to calculate the  
38 vascularisation indices (VI, FI, and VFI) automatically (Figure 2). Each volume will be  
39 recorded and analysed independently. Two regions of interest will be traced: one focused on  
40 the placenta and the other on the myometrium (placental bed).  
41  
42

43  
44 CEUS: The images will be analysed with specific software that makes it possible to trace the  
45 regions of interest and to view the perfusion curves and to extract semiquantitative perfusion  
46 indicators from them (Figure 3).  
47

### 48 *Placenta collection and analyses*

49  
50 The placentas will be collected and transferred fresh for preparation. The placental villi will  
51 be isolated and rinsed in saline solution. A portion of the villi (approximately 1 to 2 cm<sup>3</sup> of  
52 tissue) will be frozen at -80°C for the subsequent extraction of RNA and specific proteins. For  
53 an immunohistochemical analysis, a second portion will be fixed in buffered formalin for  
54 inclusion in paraffin and serial sections of 5-µm will be made on superfrost slides. The  
55 markers of oxidative stress will be specifically studied. The third portion will be fixed in  
56 formalin, diluted à 4%, and kept at 4°C in order to perform a confocal microscopic analysis.  
57  
58  
59  
60

1  
2  
3 All the villi will be collected and we consider that it is representative sampling of the  
4 placenta. However, it will be not possible to perform a spatial localization of the villi because  
5 placenta if surgically collected and as multiples parts.  
6  
7

### 8 *Outcomes*

9  
10 The principal endpoint is the measurement (in arbitrary units) of signal intensity in the  
11 intervillous space during the first trimester (at 8, 11, and 13 weeks), obtained by CEUS.  
12

13  
14 The secondary outcome measures are:

- 15  
16 1. Measurement of indicators of vascularisation in the intervillous space and the myometrium:  
17 signal intensity and perfusion kinetics.  
18 2. Comparison of the quantitative data about uteroplacental vascularisation obtained with each  
19 technique.  
20 3. Procurement of placental villi that can be analysed to study human placental development  
21 and functions.  
22  
23

### 24 25 *Participant timeline*

26  
27 The enrolment of women began in October 2016. In view of the recruitment capacity of our  
28 institutions, the recruitment should be completed by November 2019.  
29

### 30 31 *Patient and public involvement*

32  
33 Patients and public were not involved.  
34

### 35 36 *Premature ending of patient participation*

37  
38 Participants will be excluded from the study in the following situations:

- 39  
40 ▶ Lack of CEUS acquisition  
41  
42 ▶ Withdrawal of consent before the end of the study.  
43

44  
45 Patients will be immediately excluded from the study and replaced with other new  
46 participants. Any decision to withdraw consent will not affect the patient's routine medical  
47 care. In the case of an adverse event related to the study, the patient will be informed and  
48 excluded. She will also receive what additional medical care is necessary or appropriate.  
49

### 50 51 *Follow-up*

52  
53 No specific follow-up has been planned for participants except for standard routine  
54 healthcare. Any adverse events will be noted and reported.  
55

### 56 57 *Sample size consideration*

58  
59 In view of recent data from the literature (Roberts, *Hum Reprod.* 2017), to show a difference  
60 in signal intensity between the three groups (8, 11, and 13 weeks) with  $\alpha$  (corrected for the

multiple comparison) and  $\beta$  risks set respectively at 0.017 and 10%, we should have 14 women in each group at analysis, that is, 42 women in all.

#### *Data collection and management:*

An electronic case report file (e-CRF) will be created for each woman. The women's anonymity will be ensured by mentioning to the maximum extent possible their research code number, followed by the first letters of the last name and first name of the participant on all necessary documents or by deleting their names by appropriate means (white-out) from the copies of source documents intended to document the study.

The ultrasound data will be anonymised and transferred via a secure server for storage and archiving directly in the ARCHIMED database, reported to the CNIL (CNIL report number: 1410005) because they cannot be transcribed in the e-CRF. The clinical data concerning the woman collected are in Table 2.

#### *Statistical analysis*

The quantitative indicators will be described by their means  $\pm$  standard deviations, medians, and maximum and minimum values, the qualitative indicators by the number of individuals and percentages. The mean values will be compared between the groups by Student's t test or the Mann-Whitney test, matched or not, depending on the type of data. The comparison of imaging techniques will be completed by Bland-Altman plots.

The analyses will be performed with R software.

No interim analysis is planned.

No statistical criterion for stopping the study is planned.

### **QUALITY CONTROL**

#### *Right of access to data and source documents*

The medical data of each patient will only be transmitted to the sponsor (Metz-Thionville Regional Hospital Centre, CHR Metz-Thionville) or any person duly authorised by the sponsor and, where applicable, to the authorised health authorities, under conditions guaranteeing their confidentiality.

The sponsor and the regulatory authorities may request direct access to the medical file for verification of the procedures and/or data of the clinical trial, without violating confidentiality and within the limits permitted by laws and regulations.

For research purposes, the processing of personal data relating to persons undergoing research will be carried out.

These data are collected and processed solely on the basis of the legal grounds provided for by statute and regulations in the context of the performance of the public interest missions of the Metz-Thionville CHR, in particular those relating to ensuring and contributing to research

1  
2  
3 and innovation (Article 6.1.e of the GDPR, General Data Protection Regulation). The  
4 processing of personal data of persons participating in research is permitted by the exception  
5 provided for in Article 9.2(i) and (j).  
6

7  
8 This data processing is part of the MR001 reference methodology that the Metz-Thionville  
9 CHR has undertaken to respect.  
10

11 In accordance with the GDPR, persons participating in research have a right of access to their  
12 data (Article 15), a right of rectification (Article 16), a right to erase their data (right to forget)  
13 under the conditions provided for in Article 17, a right to limit the processing provided for in  
14 Article 18, and a right to object to the processing of their personal data (Article 21). These  
15 rights are exercised with the Investigators, who will inform the research sponsor as soon as  
16 possible.  
17  
18  
19

20 The persons participating in the research also have a right to complain to the supervisory  
21 authority in France, namely, the Commission Nationale de l'Informatique et des Libertés  
22 (CNIL).  
23  
24

#### 25 *Study monitoring*

26  
27 The monitoring will be performed by the appropriate department of the Support Platform for  
28 Clinical Research (PARC) of CHR Metz-Thionville, throughout the study.  
29

30 A Clinical Research Associate (CRA) will travel regularly to each centre to perform the  
31 quality control of the e-CRF data.  
32  
33

34 The CRA will verify that the research is conducted according to the protocol provided in  
35 accordance with regulations and will ensure that every e-CRF contains all of the information  
36 requested.  
37  
38

39 Each patient's e-CRF must be consistent with the source documents.  
40

41 The investigators will allocate adequate time for such monitoring activities. The investigators  
42 will also make sure that the monitor or other compliance or quality assurance reviewer is  
43 given access to all of the above noted study-related documents and study-related facilities  
44 (e.g. Ultrasound, diagnostic laboratory, etc.), and has adequate space to conduct the  
45 monitoring visits.  
46  
47

#### 48 *Data management and quality control*

49  
50 Data management will be carried out by the clinical research team CIC-IT of Nancy  
51 (INSERM CIC 1433). The data images (ultrasound) will be automatically transferred to  
52 Nancy CIC-IT and stored after verification in the ArchiMed database declared to the French  
53 authorities (CNIL declaration number: 1410005).  
54  
55

#### 56 *Patient data protection*

57  
58 Each patient must be identified on the e-CRF, ultrasound data, and placenta collection with  
59 her initials and identification number indicating her order of inclusion into the study. The  
60

1  
2  
3 investigators must keep the list of all the patients, including identification numbers, full names  
4 and last known addresses.  
5

6 Patients must be informed in writing about the possibility of audits by authorised  
7 representatives of the sponsor and/or regulatory authorities, in which case the relevant parts of  
8 study-related hospital records may be required.  
9  
10

11 Patients must also be informed that the results obtained will be computerised and analysed,  
12 that local laws will be applied, that their confidentiality will be preserved, and that they are  
13 entitled to obtain any information concerning the data stored and analysed by the  
14 computerised system.  
15  
16

### 17 **POTENTIAL RISKS RELATED TO THE STUDY**

18 This study may expose the women participating in it to rare, transient, mild side effects. It will  
19 comply at all times with the Good Clinical Practices defined by the Ministry of Health.  
20  
21  
22

23 The only constraint associated with the study is the addition of 3D Doppler acquisitions after  
24 the standard 2D ultrasound; these acquisitions will prolong the procedure by 10 minutes. The  
25 medical devices (Voluson® and Logiq E9®, GE Healthcare) are CE-marked and used  
26 routinely in clinical practice.  
27  
28

29 The contrast product (SonoVue®) is authorised for use in exploring lesions of the liver,  
30 breasts, and great vessels. It will be used according to the guidelines described in the  
31 summary of product characteristics in its French marketing authorisation. In the current state  
32 of knowledge about the safety of contrast products (which have not yet been authorised for  
33 use during pregnancy), adequate evidence exists to affirm their absence of permanent or  
34 serious adverse effects among women.  
35  
36  
37

### 38 **ETHICAL PERMISSION**

39 The sponsor and all investigators undertake to conduct this study in accordance with the  
40 Declaration of Helsinki (Ethical Principles for Medical Research Involving Human Subjects,  
41 Tokyo 2004) and its updates, the provisions of European Directive 2001/20-CE as transposed  
42 into French law by L. 2004-806 dated August 9, 2004, on public health policy and 2004-800  
43 dated August 6, 2004, on bioethics and their implementation decrees, and to comply with the  
44 guidelines of Good Clinical Practices (I.C.H. version 4 of May 1, 1996 and Decision of  
45 November 24, 2006).  
46  
47  
48  
49

50 They undertake to adhere to all legislative and regulatory provisions that may concern the  
51 research. In accordance with Article L. 1123-6 of the Public Health Code, the sponsor has  
52 submitted the research protocol the sponsor to the appropriate Committee for the Protection of  
53 Persons (CPP, Patient Protection Committee) Est III, which approved this study and the  
54 related consent forms on April 5, 2018 (Number 16.03.02). The competent authority (ANSM,  
55 Agence Nationale de Sécurité du Médicament et des Produits de Santé) authorised the study  
56 on June 21, 2018 (Number 160187A 12).  
57  
58  
59  
60

1  
2  
3 The study is registered under the number NCT02884297 on [clinicaltrials.gov](http://clinicaltrials.gov) and under the  
4 number 2015-005655-27 on EudraCT.  
5

6 The research is to be conducted in accordance with the present Protocol. The Investigators  
7 undertake to respect the protocol in all respects especially with regard to obtaining consent  
8 and the notification and follow-up of serious adverse events.  
9

### 10 *Information letter and informed consent*

11  
12  
13 Research participants will be informed of the objectives and constraints of the study, their  
14 rights to refuse to participate in the study, or to withdraw from the study at any time. When all  
15 essential information has been conveyed to the subject and the investigators have ensured that  
16 the patient has understood the implications of participating in the trial, the patient's written  
17 consent shall be obtained by an investigator in two original copies. A copy of the information  
18 forms and signed consents will be given to the patient (Annexe 1).  
19

20  
21  
22 The investigator will retain the second copy for a minimum of 15 years.  
23

## 24 **PROTOCOL AMENDMENT**

25  
26  
27 The sponsor must be informed of any proposed amendment to the protocol by the  
28 coordinating investigator. The changes must be described, substantive or not.  
29

30  
31 A substantial change is a change which is susceptible, in one way or another, to modify the  
32 assurances made to participants who consent to biomedical research (modification of an  
33 inclusion criterion, extending the inclusion period, participation of new centre, etc.).  
34

35  
36 Once the research has begun, any substantial modification thereof at the initiative of the  
37 sponsor must obtain, prior to its implementation, a favourable approval of the committee and  
38 an authorisation from the competent authority. In this case, if necessary, the committee  
39 ensures that a new consent from individuals participating in research is obtained.  
40

41  
42 Any substantial change requires that an authorisation request be made by the sponsor to the  
43 ANSM and/or a notification request by the CPP in accordance with legislative regulation n °  
44 2004-806 of August 9, 2004.  
45

## 46 **FINAL RESEARCH REPORT**

47  
48 The coordinator and the mandated biostatistician will collaboratively write the final research  
49 report. This report will be submitted to each of the investigators for review. Once consensus  
50 has been reached, the final version must be endorsed with the signature of each of the  
51 investigators and sent to the sponsor as early as possible after the effective end of the  
52 research. A report prepared according to the reference plan of the competent authority must be  
53 forwarded to the competent authority and the CPP within a year after the end of the research.  
54  
55

## 56 **DISCUSSION**

57  
58 This study is a follow-up to that recently published by Roberts et al.(12)  
59  
60

1  
2  
3 Our first objective is to confirm their data, that is, the existence of early perfusion of the  
4 intervillous space (from 8 weeks of gestation) and an increase in vascular flow starting at 13  
5 weeks. We also seek to explore the course of vascular flow rates with gestational age to test  
6 both of the hypotheses advanced about the absence of modification of flow before 13 weeks:  
7 lack of power or external regulatory factors (remodelling of the radial arteries)?  
8  
9

10 To test the first hypothesis, we chose to increase the number of individuals in each group and  
11 to select three gestational age targets: 8, 11, and 13 weeks of gestation. A significant result  
12 between 8 and 13 weeks and between 11 and 13 weeks is expected and would thus confirm  
13 the data of Roberts et al. The intermediate group at 11 weeks was chosen arbitrarily and its  
14 size was calculated to be able to show a difference between 8 and 11 weeks.  
15  
16

17 To test the second hypothesis, and as Roberts & Frias have suggested, we will examine  
18 vascular resistance of the radial arteries at these different gestational ages and assess the level  
19 of correlation between the changes in resistance and in blood flow within the intervillous  
20 space (5,17,18).  
21  
22

23 The major difference between their study and ours is the choice of contrast product, a choice  
24 linked solely to the product available by geographic zone. They used Definity® while in  
25 Europe, we use Sonovue®. In principle this difference will have no effect on the comparison  
26 of our results, as their properties and performance are similar (19).  
27  
28

29 Moreover, we have chosen to perform 3DPD angiography at the same time to assess the  
30 applicability of this technique for the detection of blood flow before 11 weeks. The use of  
31 Doppler in the first trimester of pregnancy is a problem mainly when used with regard to the  
32 fetus. Indeed, the main hypothesis is the rise in temperature that can alter organogenesis and  
33 induce spontaneous malformations or miscarriages. In this study protocol, the acquisitions are  
34 focused on the placenta and on sections where the fetus is not visible. There is, therefore, no  
35 priori any fetal risk. Obviously, a safety assessment study will be needed before it is used in  
36 clinical practice. Should there be a high correlation between the 3DPD indices and the  
37 indicators of perfusion by CEUS, future studies will be able to choose only the 3DPD, which  
38 will make it possible to envision a longitudinal follow-up.  
39  
40

41 For placental analysis, we expect to perform a confocal microscopic analysis,  
42 immunohistochemical analysis and extraction of RNA and specific protein. We will consider  
43 to perform also an histomorfometric analysis as Rizzo et al. (20)  
44  
45  
46  
47  
48  
49  
50  
51  
52

53 Contributors: C.B., M.L.E. and O.M. designed the study and are the principal investigators;  
54 A.C. and N.M. are project managers; C.B. wrote the manuscript; C.B. and M.T. will carry out  
55 recruitment, ultrasound acquisition, placental analysis and will collect the data; G.H. is in  
56 charge of statistical analysis and all authors reviewed and contributed to the manuscript.  
57  
58  
59  
60

1  
2  
3 All authors have read, approved the paper and meet the criteria for authorship as established  
4 by the International Committee of Medical Journals Editors.  
5

6 Fundings: This study won the regional award for clinical research (2016).  
7

8 Competing interests: None declared  
9

10 Patient consent: Obtained  
11

12  
13 Ethics approval: ANSM (the French National Agency for Medicines and Health Products  
14 Safety) and the Committee for the Protection of Persons (Comité de Protection des Personnes,  
15 CPP) approved this study.  
16

17  
18 Data sharing statement: All data generated during the project will be made freely available via  
19 CIC-IT, Nancy. Data obtained from this study will be deposited at CIC-IT Nancy where they  
20 will be maintained for a minimum of 15 years. There are no security, licensing or ethical  
21 issues related to the expected data, and all data used in the project will be generated directly  
22 as a result of the project, without any pre-existing data being used.  
23  
24

25 Trial status: This is an ongoing trial. Recruitment began in October 2016. We expect to  
26 complete recruitment by November 2019. We plan to publish final results in 2020.  
27  
28  
29  
30  
31  
32  
33  
34  
35  
36  
37  
38  
39  
40  
41  
42  
43  
44  
45  
46  
47  
48  
49  
50  
51  
52  
53  
54  
55  
56  
57  
58  
59  
60



## REFERENCES

1. Burton GJ, Jauniaux E. Pathophysiology of placental-derived fetal growth restriction. *Am J Obstet Gynecol*. 2018 Feb;218(2S):S745–61.
2. Jauniaux E, Watson A, Burton G. Evaluation of respiratory gases and acid-base gradients in human fetal fluids and uteroplacental tissue between 7 and 16 weeks' gestation. *Am J Obstet Gynecol*. 2001 Apr;184(5):998–1003.
3. Kurjak A, Kupesic S. Doppler assessment of the intervillous blood flow in normal and abnormal early pregnancy. *Obstet Gynecol*. 1997 Feb;89(2):252–6.
4. Carbillon L, Challier JC, Alouini S, Uzan M, Uzan S. Uteroplacental circulation development: Doppler assessment and clinical importance. *Placenta*. 2001 Nov;22(10):795–9.
5. Coppens M, Loquet P, Kollen M, De Neubourg F, Buytaert P. Longitudinal evaluation of uteroplacental and umbilical blood flow changes in normal early pregnancy. *Ultrasound Obstet Gynecol Off J Int Soc Ultrasound Obstet Gynecol*. 1996 Feb;7(2):114–21.
6. Burton GJ, Jauniaux E, Watson AL. Maternal arterial connections to the placental intervillous space during the first trimester of human pregnancy: the Boyd collection revisited. *Am J Obstet Gynecol*. 1999 Sep;181(3):718–24.
7. Greenwold N, Jauniaux E, Gulbis B, Hempstock J, Gervy C, Burton GJ. Relationship among maternal serum endocrinology, placental karyotype, and intervillous circulation in early pregnancy failure. *Fertil Steril*. 2003 Jun;79(6):1373–9.
8. Hempstock J, Jauniaux E, Greenwold N, Burton GJ. The contribution of placental oxidative stress to early pregnancy failure. *Hum Pathol*. 2003 Dec;34(12):1265–75.
9. Jauniaux E, Watson AL, Hempstock J, Bao YP, Skepper JN, Burton GJ. Onset of maternal arterial blood flow and placental oxidative stress. A possible factor in human early pregnancy failure. *Am J Pathol*. 2000 Dec;157(6):2111–22.
10. Jauniaux E, Burton GJ. [The role of oxidative stress in placental-related diseases of pregnancy]. *J Gynecol Obstet Biol Reprod (Paris)*. 2016 Oct;45(8):775–85.
11. Trophoblastic oxidative stress in relation to temporal and regional differences in maternal placental blood flow in normal and abnormal early pregn... - PubMed - NCBI [Internet]. [cited 2019 Mar 10]. Available from: <https://www.ncbi.nlm.nih.gov/pubmed/12507895>
12. Roberts VHJ, Morgan TK, Bednarek P, Morita M, Burton GJ, Lo JO, et al. Early first trimester uteroplacental flow and the progressive disintegration of spiral artery plugs: new insights from contrast-enhanced ultrasound and tissue histopathology. *Hum Reprod Oxf Engl*. 2017 Dec 1;32(12):2382–93.
13. Shih JC, Ko TL, Lin MC, Shyu MK, Lee CN, Hsieh FJ. Quantitative three-dimensional power Doppler ultrasound predicts the outcome of placental chorioangioma.

- 1  
2  
3 Ultrasound Obstet Gynecol Off J Int Soc Ultrasound Obstet Gynecol. 2004 Aug;24(2):202–6.  
4  
5 14. Duan J, Perdriolle-Galet E, Chabot-Lecoanet A-C, Callec R, Beaumont M, Chavatte-  
6 Palmer P, et al. [Placental 3D Doppler angiography: current and upcoming applications]. J  
7 Gynecol Obstet Biol Reprod (Paris). 2015 Feb;44(2):107–18.  
8  
9 15. Duan J, Chabot-Lecoanet A-C, Perdriolle-Galet E, Christov C, Hossu G, Cherifi A, et  
10 al. Utero-placental vascularisation in normal and preeclamptic and intra-uterine growth  
11 restriction pregnancies: third trimester quantification using 3D power Doppler with  
12 comparison to placental vascular morphology (EVUPA): a prospective controlled study. BMJ  
13 Open. 2016 Mar 31;6(3):e009909.  
14  
15 16. Hafner T, Kurjak A, Funduk-Kurjak B, Bekavac I. Assessment of early chorionic  
16 circulation by three-dimensional power Doppler. J Perinat Med. 2002;30(1):33–9.  
17  
18 17. Burton GJ, Woods AW, Jauniaux E, Kingdom JCP. Rheological and physiological  
19 consequences of conversion of the maternal spiral arteries for uteroplacental blood flow  
20 during human pregnancy. Placenta. 2009 Jun;30(6):473–82.  
21  
22 18. Kurjak A, Zudenigo D, Predanic M, Kupesic S, Funduk B. Assessment of the  
23 fetomaternal circulation in threatened abortion by transvaginal color Doppler. Fetal Diagn  
24 Ther. 1994 Oct;9(5):341–7.  
25  
26 19. Hyvelin J-M, Gaud E, Costa M, Helbert A, Bussat P, Bettinger T, et al. Characteristics  
27 and Echogenicity of Clinical Ultrasound Contrast Agents: An In Vitro and In Vivo  
28 Comparison Study. J Ultrasound Med Off J Am Inst Ultrasound Med. 2017 May;36(5):941–  
29 53.  
30  
31 20. Rizzo G, Silvestri E, Capponi A, Servadei F, Pietrolucci ME, Capece A, et al.  
32 Histomorphometric characteristics of first trimester chorionic villi in pregnancies with low  
33 serum pregnancy-associated plasma protein-A levels: relationship with placental three-  
34 dimensional power doppler ultrasonographic vascularization. J Matern-Fetal Neonatal Med  
35 Off J Eur Assoc Perinat Med Fed Asia Ocean Perinat Soc Int Soc Perinat Obstet. 2011  
36 Feb;24(2):253–7.  
37  
38  
39  
40  
41  
42  
43  
44  
45  
46  
47

### **Tables and Figures**

48  
49  
50 Table 1 : Inclusion and non inclusion criteria

51  
52 Table 2 : Data collected

53  
54 Figure 1 : Flow Chart

55  
56 Figure 2 : Three dimensional Power Doppler (3DPD) Analysis

57  
58 Figure 3 : Contrast-enhanced Ultrasound (CEUS) Analysis  
59  
60

1  
2  
3  
4  
5  
6  
7  
8  
9  
10  
11  
12  
13  
14  
15  
16  
17  
18  
19  
20  
21  
22  
23  
24  
25  
26  
27  
28  
29  
30  
31  
32  
33  
34  
35  
36  
37  
38  
39  
40  
41  
42  
43  
44  
45  
46  
47  
48  
49  
50  
51  
52  
53  
54  
55  
56  
57  
58  
59  
60

For peer review only

Table 1 : Inclusion and non inclusion criteria

| Inclusion criteria                                                                                                                                                                                                                                                                                                                                                                                                                  | Non inclusion criteria                                                                                                                                                                                                                                                                                                                                                                                                                                                              |
|-------------------------------------------------------------------------------------------------------------------------------------------------------------------------------------------------------------------------------------------------------------------------------------------------------------------------------------------------------------------------------------------------------------------------------------|-------------------------------------------------------------------------------------------------------------------------------------------------------------------------------------------------------------------------------------------------------------------------------------------------------------------------------------------------------------------------------------------------------------------------------------------------------------------------------------|
| <ul style="list-style-type: none"> <li>- Woman age <math>\geq</math> 18 years</li> <li>- Gestational age</li> <li><b>8 WG Group</b> : 8 to 8+6</li> <li><b>11 WG Group</b> : 11 to 11+6</li> <li><b>13 WG Group</b> : 13 to 13+6</li> <li>- Body Mass Index <math>\leq</math> 40 kg/m<sup>2</sup></li> <li>- Have given informed and written consent</li> <li>- Have confirmed her request of surgical elective abortion</li> </ul> | <ul style="list-style-type: none"> <li>- Contraindication to contrast injection :<br/>Hypersensitivity to sulfur hexafluoride or any of the other ingredients, history of cardiac disease, respiratory distress syndrome, severe pulmonary hypertension</li> <li>- Woman considered at risk of IUGR/PE :<br/>History of PE or IUGR, Autoimmune disease, Chronic High Blood Pressure, Diabetes</li> <li>- Woman unable to understand or follow the procedure of the study</li> </ul> |

Table 2 : Data collected

|                               |                                                                                                                                                                        |
|-------------------------------|------------------------------------------------------------------------------------------------------------------------------------------------------------------------|
| Family History                | Preeclampsia, intrauterine growth restriction, venous thromboembolic disease, high blood pressure, diabetes                                                            |
| Obstetrical History           | Parity, history of post-partum hemorrhage, history of pregnancy loss or intrauterine fetal death<br>Fibroma or uterine malformation                                    |
| Clinical data                 | Body Mass Index<br>Proteinuria<br>Blood pressure (systolic and diastolic)<br>Smoking                                                                                   |
| Current treatments            |                                                                                                                                                                        |
| Ultrasound and pregnancy data | Date of pregnancy ; Crown length crump (LCC), placental position, depth from the maternal abdomen, blood pressure and heart rate at the beginning of CEUS acquisition, |

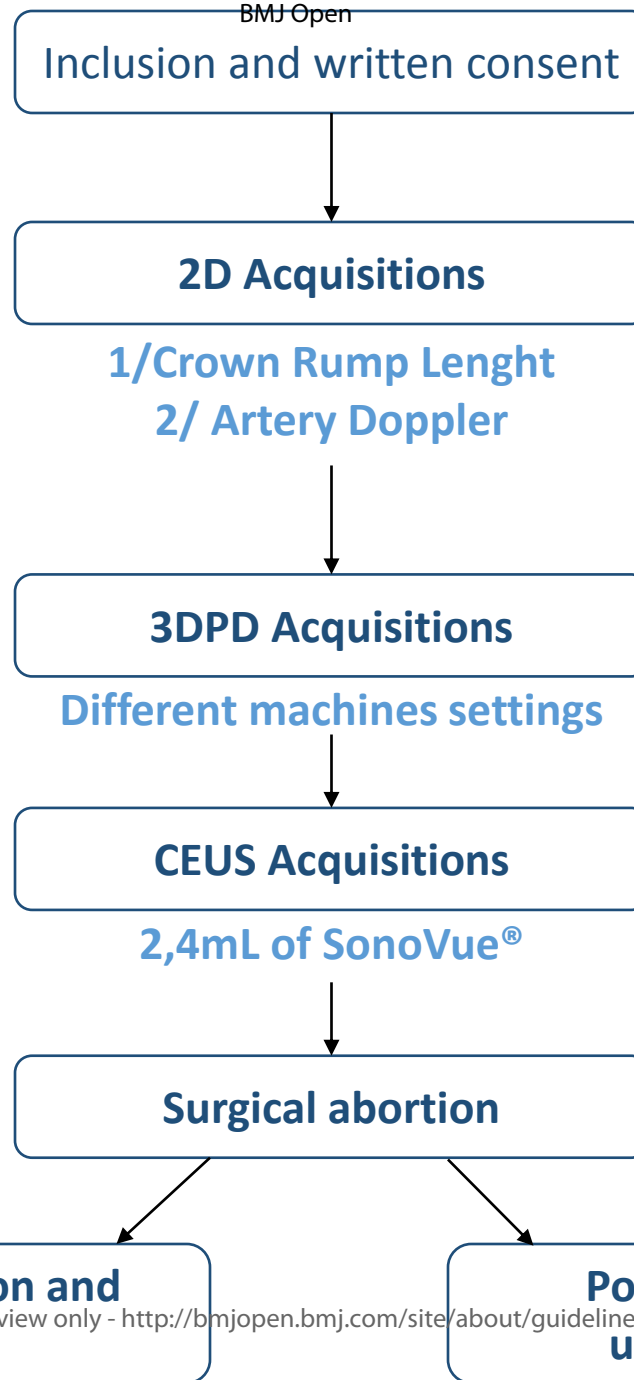

1  
2  
3  
4  
5  
6  
7  
8  
9  
10  
11  
12  
13  
14  
15  
16  
17  
18  
19  
20  
21  
22  
23  
24  
25  
26  
27  
28  
29  
30  
31  
32  
33  
34  
35  
36  
37  
38  
39  
40  
41

**Placenta collection and analysis**

**Post-processing of ultrasound data**

# 1 3DPD Acquisitions



# 3 Placental vascularisation in 3D

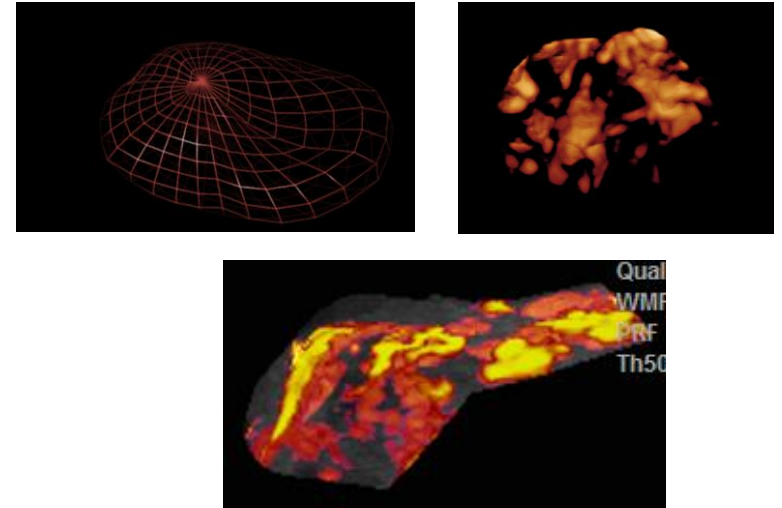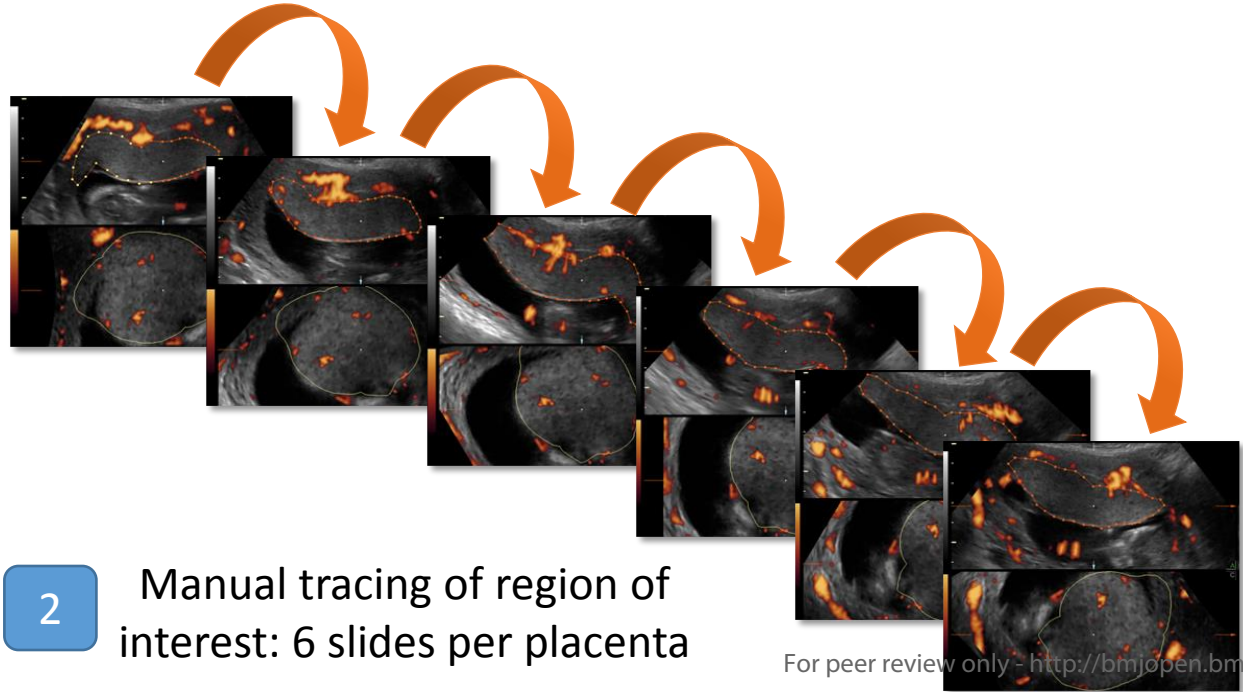

# 2 Manual tracing of region of interest: 6 slides per placenta

# 4 3DPD indices, automatically calculated

Contour (enveloppe) - Histogramme

|      |                    |               |              |             |         |
|------|--------------------|---------------|--------------|-------------|---------|
| gris | MG (0, 100) 46.156 | Angio couleur | VI (%) 4.583 | Couleur CFM | VI (%)  |
|      |                    | FI            | 44.751       | FI          | (0,100) |
|      |                    | VFI           | 2.051        |             |         |

gris

Angio couleur

Couleur CFM

MG : Valeur moyenne de gris  
 VI : Indice de vascularisation  
 FI : Indice de débit  
 VFI : Indice de débit de vascularisation

Retour

1  
2  
3  
4

1

2D acquisition with contrast injection  
(for exemple of 13 weeks of gestation)

3

Signal intensity curves as a function of time (in secondes)



16 2D Without injection      With injection ; 17s      With injection ; 19s      With injection ; 27s

17  
18  
19  
20

2

Manual tracing of region of interest

4

Extraction of semiquantitative indicators and parametric image

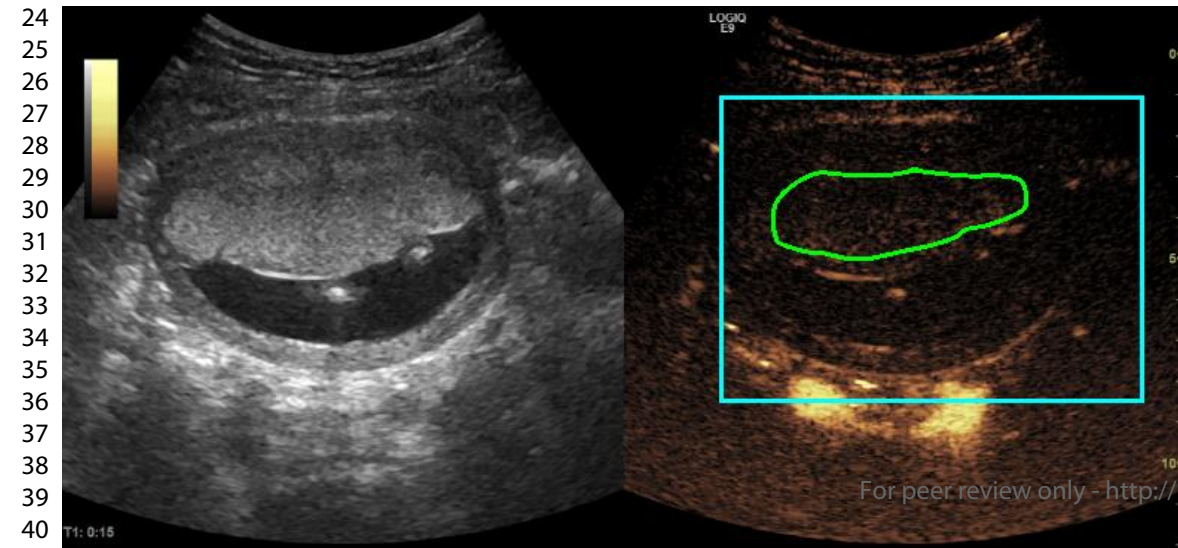

| PARAMETERS |                                            |              |          |
|------------|--------------------------------------------|--------------|----------|
| PE         | Peak Enhancement                           | ABSOLUTEROI1 |          |
| WiAUC      | Wash-in Area Under the Curve               | PE[a.u]      | 9,86E+03 |
| RT         | Rise Time                                  | WiAUC[a.u]   | 5,19E+04 |
| mTTI       | mean Transit Time (local)                  | RT[s]        | 8,065    |
| TTP        | Time To Peak                               | mTTI[s]      | 148,891  |
| WiR        | Wash-in Rate                               | TTP[s]       | 10,662   |
| WiPI       | Wash-in Perfusion Index (WiAUC / WiR[a.u]) | WiPI[a.u]    | 1,88E+03 |
| WoAUC      | Wash-out AUC                               | WoAUC[a.u]   | 1,30E+05 |
| WiWoAUC    | Wash-in and Wash-out AUC                   | WiWoAUC[     | 1,82E+05 |
| FT         | Fall Time                                  | FT[s]        | 19,599   |
| WoR        | Wash-out Rate                              | WoR[a.u]     | 5,51E+02 |
| QOF        | Quality Of Fit                             | QOF[%]       | 89,227   |
| Area       | ROI Area                                   | Area[cm2]    | 4,662    |



Parametric image of Peak enhancement

## PATIENT CONSENT FORM

Details about this study are provided in the specific newsletter provided to you.  
Read this manual carefully and ask all the questions that you think will be useful.  
If you agree to participate in this study, please complete the form below.

**Title of the study :** Assessment of uteroplacental vascularisation in early first-trimester pregnancy with contrast-enhanced ultrasound and 3D power Doppler angiography: protocol for a multicentre prospective study (HOPE).

**SPONSOR :** Centre Hospitalier Régional (CHR) de Metz-Thionville  
CHR-METZ-THIONVILLE  
Hôpital de Mercy 1, Allée du Château - CS 45001  
57085 Metz Cedex 03.

I, the undersigned, Mrs. .... (full name in capital letters), declares to have understood the purpose and the modalities of this study, which were fully explained to me by the Doctor ..... (full name in capital letters), investigator doctor. I received the specific information form that I had the opportunity to study carefully.

Answers have been made to all my questions.

I had a minimum of one hour to think about it before making my decision.

**I freely agree to participate in this study under the conditions specified in this document:**       Yes       No

My agreement was also requested for a placental sample for biological analysis.

**I give freely my permission for the analysis of the placenta:**

Yes       No

I accept that any new information becoming available during the study and that may have implications for me will be provided by the investigating doctor:

Yes       No

- ✓ I understand that my data and samples will not be used for any other purpose than this research.
- ✓ I agree to participate in this research under the conditions specified in the attached information form.
- ✓ I remain free to return to my decision at any time and not to participate in the study. I will then inform the investigator.
- ✓ No longer participating in this research will not affect my relationship with my doctors and will not call into question the quality of future care.
- ✓ I have been informed that in accordance with the regulation on clinical studies, the Committee for the Protection of Persons East III has given a favorable opinion for the realization of this study dated 05 / April / 2016 and the ANSM has given its authorization for the realization of this study dated 21 / June / 2016



Etude HOPE – Version 3.0 du 26/11/2018

- 1  
2  
3 ✓ I have also been informed that in accordance with the law in force, an insurance  
4 contract has been taken out by the research sponsor.  
5

6 All data concerning me, including my medical file, will remain confidential. I authorize their  
7 consultation only by the persons who collaborate in the research, the persons charged by the  
8 sponsor to control the quality of the study as well as by a representative of the health  
9 authorities.  
10

- 11  
12  
13 ➤ I agree that the data recorded during this research may be the subject of a computerized  
14 treatment by the promoter or on his behalf.  
15

16 I was informed of the purpose of the data processing (I was told what the data would be used  
17 for) and the recipients of this data. I have noted that my rights of access, rectification,  
18 deletion, limitation and opposition provided by the General Data Protection Regulation  
19 (GDPR) are exercised at any time by the Investigator who follow me as part of the research  
20 and who knows my identity. I confirm being affiliated to a social security scheme.  
21

- 22  
23 ➤ I give my consent to participate in this research.  
24 ➤ I may at any time request any additional information from the investigator.  
25 ➤ My consent does not relieve the investigator and sponsor of all of their responsibilities  
26 and I retain all my rights guaranteed by law.  
27 ➤ I understand that I have the right to be informed of the overall results of this research  
28 at the end of this research. They can be communicated to me by mail (or during a  
29 follow-up consultation) if I wish.  
30  
31

|                                                                                                    |                 |
|----------------------------------------------------------------------------------------------------|-----------------|
| 32 TO BE COMPLETED BY THE PATIENT                                                                  |                 |
| 33 Date : .....                                                                                    |                 |
| 34 Signature of the patient                                                                        |                 |
| 35                                                                                                 |                 |
| 36                                                                                                 |                 |
| 37                                                                                                 |                 |
| 38                                                                                                 |                 |
| 39                                                                                                 |                 |
| 40 TO BE COMPLETED BY THE INVESTIGATOR DOCTOR                                                      |                 |
| 41 I, the undersigned Doctor ..... (full name in capital letters) confirms that she                |                 |
| 42 has fully explained to the patient the purpose and modalities of this study as well as its      |                 |
| 43 potential risks. I undertake to enforce the terms of this consent form, reconciling respect for |                 |
| 44 individual rights and freedoms with the requirements of scientific work.                        |                 |
| 45 Phone number of the investigator: .....                                                         |                 |
| 46                                                                                                 | 47              |
| 48 Signature of the investigateur :                                                                | 49 Date : ..... |
| 50                                                                                                 | 51              |
| 52                                                                                                 | 53              |

54 *Done in two copies, one of which will be kept by the investigator and the other given to the*  
55 *patient.*  
56  
57  
58  
59  
60

Etude HOPE – Version 3.0 du 26/11/2018

**PATIENT CONSENT FORM**

**HOPE - complementary genetic study from placental samples**

The details concerning this interventional research were communicated to you by the investigator verbally and were given to you in writing in a specific information document.

After reading this document and after asking the investigator all useful questions, if you agree to participate in this research, please complete the consent form below.

**Title of the study :** Assessment of uteroplacental vascularisation in early first-trimester pregnancy with contrast-enhanced ultrasound and 3D power Doppler angiography: protocol for a multicentre prospective study (HOPE).

**SPONSOR :** Centre Hospitalier Régional (CHR) de Metz-Thionville  
CHR-METZ-THIONVILLE  
Hôpital de Mercy 1, Allée du Château - CS 45001  
57085 Metz Cedex 03.

**By signing this consent form, I confirm the following:**

- I understood the purpose and the modalities of this research, which were fully explained to me.
- I received the information document specific to this research and I had the opportunity to study each page carefully.
- I had a reflexion period before making my decision.
- I am compulsorily affiliated to a social security scheme.
- I declare that I am not placed under a system of legal protection of the adults (safeguard of justice, curatorship or trusteeship) and currently aimed by a proceeding tending for this purpose.

I was clearly informed:

- That I am free to accept or refuse to participate, and I am free to stop my participation in the course of research at any time. This will not influence the quality of care that will be provided to me.

## Etude HOPE – Version 3.0 du 26/11/2018

- 1  
2  
3  
4  
5  
6  
7  
8  
9  
10  
11  
12  
13  
14  
15  
16  
17  
18  
19  
20  
21  
22  
23
- The purpose of the treatment (I was told what the data would be used for) and the recipients of this data. I have noted that my right of access, rectification and opposition provided by the law of 6 January 1978 relating to computers, files and freedoms is exercised at any time by the investigator who follows in the course of research and who knows my identity
  - All data concerning me, including my medical file, will remain confidential and may be consulted by authorized persons (detailed in the attached information document) subject to professional secrecy.
  - Placental data and samples may be transmitted to other national or international teams (outside the European Union) in the context of research collaborations, in a form that will not allow my direct or indirect identification.
  - The placental samples can be preserved and reused in the same theme.
  - An analysis of my genetic characteristics may be performed from my biological samples (as part of this research and / or for future research). This is not meant to identify or re-identify me based on my genetic characteristics.
  - That I will be notified by the investigator in case of "diagnosis of a serious genetic abnormality" found during a genetic analysis:  **Oui**       **Non**

24  
25  
26  
27  
28  
29  
30

After having discussed and having obtained the answer to all my questions, I accept freely and voluntarily, under the conditions specified in the attached information document, to participate in the research that is proposed to me.

31  
32  
33  
34

My consent does not relieve the investigator and sponsor of all of their responsibilities and I retain all my rights guaranteed by law.

35  
36  
37  
38  
39  
40  
41

I understand that I have the right to be informed of the overall results of this research at the end of this research. They can be communicated to me by mail (or during a follow-up consultation) if I wish.

42  
43  
44  
45

Done in two copies, one of which will be given to me, the 2nd will be kept by the investigator.

46  
47

**TO BE COMPLETED BY THE PATIENT**

48  
49

Date: \_\_\_ / \_\_\_ / \_\_\_

50  
51

Last name .....First Name :.....

52  
53  
54  
55  
56  
57  
58  
59  
60

Signature of the person suitable for research:

Etude HOPE – Version 3.0 du 26/11/2018

**TO BE COMPLETED BY THE INVESTIGATOR DOCTOR**

Date: \_\_\_ / \_\_\_ / \_\_\_

Last name .....First Name :.....

I certify that the information requirements of the person who is willing to search for and obtain his free and informed consent have been met in accordance with the regulations in force.

Signature of the Investigator:

For peer review only

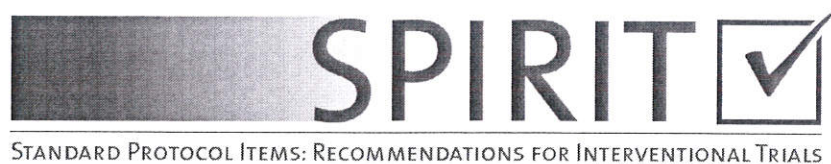

STANDARD PROTOCOL ITEMS: RECOMMENDATIONS FOR INTERVENTIONAL TRIALS

SPIRIT 2013 Checklist: Recommended items to address in a clinical trial protocol and related documents\*

| Section/item                                         | Item No | Description                                                                                                                                                                                                                                                                              |
|------------------------------------------------------|---------|------------------------------------------------------------------------------------------------------------------------------------------------------------------------------------------------------------------------------------------------------------------------------------------|
| <b>Administrative information</b>                    |         |                                                                                                                                                                                                                                                                                          |
| <i>page 1</i><br>Title                               | 1       | Descriptive title identifying the study design, population, interventions, and, if applicable, trial acronym                                                                                                                                                                             |
| <i>p 9</i><br>Trial registration                     | 2a      | Trial identifier and registry name. If not yet registered, name of intended registry                                                                                                                                                                                                     |
|                                                      | 2b      | All items from the World Health Organization Trial Registration Data Set                                                                                                                                                                                                                 |
| <i>PM</i><br>Protocol version                        | 3       | Date and version identifier                                                                                                                                                                                                                                                              |
| <i>PM</i><br>Funding                                 | 4       | Sources and types of financial, material, and other support                                                                                                                                                                                                                              |
| <i>P1</i><br><i>PM</i><br>Roles and responsibilities | 5a      | Names, affiliations, and roles of protocol contributors                                                                                                                                                                                                                                  |
|                                                      | 5b      | Name and contact information for the trial sponsor                                                                                                                                                                                                                                       |
|                                                      | 5c      | Role of study sponsor and funders, if any, in study design; collection, management, analysis, and interpretation of data; writing of the report; and the decision to submit the report for publication, including whether they will have ultimate authority over any of these activities |
|                                                      | 5d      | Composition, roles, and responsibilities of the coordinating centre, steering committee, endpoint adjudication committee, data management team, and other individuals or groups overseeing the trial, if applicable (see Item 21a for data monitoring committee)                         |
| <b>Introduction</b>                                  |         |                                                                                                                                                                                                                                                                                          |
| <i>p 3-4</i><br>Background and rationale             | 6a      | Description of research question and justification for undertaking the trial, including summary of relevant studies (published and unpublished) examining benefits and harms for each intervention                                                                                       |
|                                                      | 6b      | Explanation for choice of comparators                                                                                                                                                                                                                                                    |
| <i>p 4</i><br>Objectives                             | 7       | Specific objectives or hypotheses                                                                                                                                                                                                                                                        |
| <i>p 4</i><br>Trial design                           | 8       | Description of trial design including type of trial (eg, parallel group, crossover, factorial, single group), allocation ratio, and framework (eg, superiority, equivalence, noninferiority, exploratory)                                                                                |

- 1  
2 Allocation 16b Mechanism of implementing the allocation sequence (eg, central  
3 concealment telephone; sequentially numbered, opaque, sealed envelopes),  
4 mechanism describing any steps to conceal the sequence until interventions are  
5 assigned  
6  
7 Implementation 16c Who will generate the allocation sequence, who will enrol participants,  
8 and who will assign participants to interventions  
9  
10 Blinding 17a Who will be blinded after assignment to interventions (eg, trial  
11 (masking) participants, care providers, outcome assessors, data analysts), and  
12 how  
13  
14  
15 17b If blinded, circumstances under which unblinding is permissible, and  
16 procedure for revealing a participant's allocated intervention during  
17 the trial  
18

### 19 **Methods: Data collection, management, and analysis**

- 20  
21  
22 *p6-7-15* Data collection 18a Plans for assessment and collection of outcome, baseline, and other  
23 methods trial data, including any related processes to promote data quality (eg,  
24 duplicate measurements, training of assessors) and a description of  
25 study instruments (eg, questionnaires, laboratory tests) along with  
26 their reliability and validity, if known. Reference to where data  
27 collection forms can be found, if not in the protocol  
28  
29  
30 18b Plans to promote participant retention and complete follow-up,  
31 including list of any outcome data to be collected for participants who  
32 discontinue or deviate from intervention protocols  
33  
34 *p6-7* Data 19 Plans for data entry, coding, security, and storage, including any  
35 management related processes to promote data quality (eg, double data entry;  
36 range checks for data values). Reference to where details of data  
37 management procedures can be found, if not in the protocol  
38  
39  
40 *p7* Statistical 20a Statistical methods for analysing primary and secondary outcomes.  
41 methods Reference to where other details of the statistical analysis plan can be  
42 found, if not in the protocol  
43  
44 20b Methods for any additional analyses (eg, subgroup and adjusted  
45 analyses)  
46  
47 20c Definition of analysis population relating to protocol non-adherence  
48 (eg, as randomised analysis), and any statistical methods to handle  
49 missing data (eg, multiple imputation)  
50  
51

### 52 **Methods: Monitoring**

- 53  
54 *p8* Data monitoring 21a Composition of data monitoring committee (DMC); summary of its role  
55 and reporting structure; statement of whether it is independent from  
56 the sponsor and competing interests; and reference to where further  
57 details about its charter can be found, if not in the protocol.  
58 Alternatively, an explanation of why a DMC is not needed  
59  
60

**Appendices**

|                            |    |                                                                                                                                                                                                |
|----------------------------|----|------------------------------------------------------------------------------------------------------------------------------------------------------------------------------------------------|
| Informed consent materials | 32 | Model consent form and other related documentation given to participants and authorised surrogates                                                                                             |
| Biological specimens       | 33 | Plans for collection, laboratory evaluation, and storage of biological specimens for genetic or molecular analysis in the current trial and for future use in ancillary studies, if applicable |

---

\*It is strongly recommended that this checklist be read in conjunction with the SPIRIT 2013 Explanation & Elaboration for important clarification on the items. Amendments to the protocol should be tracked and dated. The SPIRIT checklist is copyrighted by the SPIRIT Group under the Creative Commons "Attribution-NonCommercial-NoDerivs 3.0 Unported" license.
